# Supplementary material
Source: publisher site journal article supplement (https://www.spandidos-publications.com/7874/downloadSupplementary)
Supplement: Supplementary file 1 [file downloadSupplementary]

## Sheet: Table SXIII
Table SXIII. Genes associated with EFNA3 expression levels in ACC.
Query	Statistic	P-value	False discovery rate (Benjamini-Hochberg)	Event SD	Event TD
A1BG	-0.287297	0.0102518953817141	0.0422844224103969	79	79
A1CF	-0.174569	0.123873404910691	0.25456504632587	79	8
A2BP1	0.0901614138074165	0.429405009211638	0.599897505457524	79	56
A2LD1	0.0308867784603644	0.786993777864326	0.874136208585806	79	79
A2ML1	-0.23118	0.0403763629855408	0.11584021067206	79	69
A2M	-0.572801	3.4662910071596e-08	2.50142045068905e-06	79	79
A4GALT	-0.151456	0.182724647815272	0.334219758078858	79	79
A4GNT	-0.117892	0.300781199158498	0.472167888938747	79	27
AAA1	-0.213696	0.0586234245684159	0.150428158571469	79	5
AAAS	-0.00701735	0.95105801903061	0.97422998347733	79	79
AACSL	-0.0602862	0.597655437278471	0.738808319396972	79	23
AACS	0.383033441441687	0.000493811236500226	0.00408132876663007	79	79
AADACL2	-0.0537158	0.638236114026075	0.768753648550997	79	3
AADACL4	-0.256467	0.0225187131835	0.0759128312652761	79	4
AADAC	0.124212942457719	0.275421749625119	0.444871009704244	79	74
AADAT	-0.260732	0.0202979512245516	0.0704653341739057	79	78
AAGAB	0.126656386900312	0.266013696063749	0.434328715962457	79	79
AAK1	0.299767611237505	0.00727585385605036	0.0325558913046693	79	79
AAMP	0.263105244519487	0.0191450870501178	0.0674559999178864	79	79
AANAT	-0.119138	0.295664918327255	0.467322615270441	79	26
AARS2	-0.131526	0.24791590720264	0.413776043932895	79	79
AARSD1	0.00738336645242019	0.948508685751482	0.973090663001305	79	79
AARS	-0.1344	0.237643500383104	0.401469715007794	79	79
AASDHPPT	-0.196336	0.0828864177332178	0.191588779605645	79	79
AASDH	-0.0981048	0.389704304598698	0.561971719625157	79	79
AASS	-0.132047	0.246033434408695	0.411580885863174	79	79
AATF	0.243107800039805	0.0308619211497027	0.0952096913439545	79	79
AATK	0.530542207711298	4.92612463927848e-07	1.82545707517061e-05	79	79
ABAT	-0.396583	0.000296549269795235	0.00273237869358735	79	79
ABCA10	0.239552872541983	0.0334766306925253	0.101272960674713	79	79
ABCA11P	-0.251749	0.0252137579032956	0.0824263147142894	79	79
ABCA12	-0.0887169	0.436864212055412	0.606684418486441	79	49
ABCA13	-0.172363	0.128770992401342	0.261629392819316	79	64
ABCA17P	-0.137954	0.225350135805588	0.386509744071363	79	79
ABCA1	-0.115101	0.312451322512002	0.484094861714292	79	79
ABCA2	0.224013890767049	0.0471842353024563	0.1293518917897	79	79
ABCA3	-0.398587	0.000274496432925664	0.00256054738505379	79	79
ABCA4	-0.0859476	0.451367247425254	0.619504830402697	79	72
ABCA5	0.159037636812583	0.161527026144736	0.306297939566545	79	79
ABCA6	-0.330263	0.00295344056975792	0.0163245329005768	79	79
ABCA7	0.183565367097139	0.10537167128378	0.226722350210787	79	79
ABCA8	-0.342738	0.00198819170101422	0.0120123797243408	79	79
ABCA9	-0.162514	0.152441505933309	0.294852404183738	79	79
ABCB10	-0.00490371	0.965788659302146	0.982071165338938	79	79
ABCB11	0.163593884035824	0.149696876000906	0.291279987443515	79	21
ABCB1	0.386488738408302	0.000434493821417486	0.00368556433698047	79	79
ABCB4	0.539668554622066	2.86303844282106e-07	1.21162283335141e-05	79	79
ABCB5	-0.116222	0.307726521802322	0.479799333413166	79	50
ABCB6	0.490856513507964	4.37587075163441e-06	9.95639298077759e-05	79	79
ABCB7	-0.368392	0.000836406189076016	0.00615528755583339	79	79
ABCB8	0.0918292634096595	0.420883460804632	0.592207066712374	79	79
ABCB9	0.0245790283168345	0.829756786741893	0.90009776882742	79	79
ABCC10	0.0613942256196194	0.590926776650757	0.73339294285227	79	79
ABCC11	0.0286755045960616	0.801920380452557	0.883208437241028	79	74
ABCC12	-0.0853589	0.454483906948275	0.622193233024798	79	11
ABCC13	0.0316720043981218	0.781711427471206	0.870806230661979	79	21
ABCC1	-0.0987756	0.386455254666996	0.558651831757928	79	79
ABCC2	-0.156777	0.167646448855244	0.314693033180667	79	77
ABCC3	0.272378659545005	0.0151625409695729	0.0569626150644016	79	79
ABCC4	-0.288	0.0100593459860249	0.0417484444999402	79	79
ABCC5	0.309439795610095	0.0055204952509433	0.0264207815276524	79	79
ABCC6P1	-0.181399	0.109617540630886	0.233660667453029	79	69
ABCC6P2	-0.107698	0.344796457588809	0.518011612659641	79	79
ABCC6	-0.338103	0.00230743804289547	0.0134172735266381	79	79
ABCC8	-0.00146384	0.989784539434833	0.995229844948517	79	34
ABCC9	-0.219452	0.0519921811967943	0.138122085761814	79	79
ABCD1	-0.0971466	0.39437371644951	0.565815109505454	79	79
ABCD2	0.0769469817845528	0.50029928729706	0.66196820485976	79	79
ABCD3	-0.0338604	0.767042276904863	0.860675193510098	79	79
ABCD4	0.0446093575156786	0.696262061195389	0.812177347014106	79	79
ABCE1	0.05649242722983	0.620947772178983	0.755766514407901	79	79
ABCF1	-0.098	0.390213313932494	0.562343511889373	79	79
ABCF2	-0.120704	0.289318852808693	0.460680603764213	79	79
ABCF3	-0.10045	0.378414834866446	0.550390532173954	79	79
ABCG1	-0.204221	0.0710276983600774	0.172103523885548	79	79
ABCG2	-0.394784	0.000317720520234172	0.00287270446999948	79	79
ABCG4	-0.0698826	0.540551836385124	0.694124004154378	79	78
ABCG5	0.214965473542824	0.057104920392255	0.147747044867721	79	72
ABCG8	0.172229513420488	0.129070914013293	0.261942447330222	79	22
ABHD10	-0.171566	0.13057492096956	0.264182338272966	79	79
ABHD11	-0.160675	0.157198330693632	0.300683979390252	79	79
ABHD12B	0.0584154435324146	0.609092646842015	0.74707329971617	79	30
ABHD12	-0.357453	0.00122058710428376	0.00821655224394287	79	79
ABHD13	0.138438629455081	0.223708699161842	0.384375110322497	79	79
ABHD14A	0.146030510334656	0.199087496716676	0.355395254430544	79	79
ABHD14B	-0.316263	0.00451877661614877	0.0226578892279396	79	79
ABHD15	-0.338707	0.00226335909379486	0.0132405822365374	79	79
ABHD1	-0.106195	0.351608915599216	0.524619381861506	79	75
ABHD2	-0.000706351	0.995070607107194	0.997560500867593	79	79
ABHD3	-0.0381715	0.738387253603259	0.841544762258925	79	79
ABHD4	0.0433559074045735	0.704396830290957	0.817954650124714	79	79
ABHD5	-0.158793	0.162182158296976	0.307182533118022	79	79
ABHD6	0.291944710442974	0.00903730715233588	0.0385066138634448	79	79
ABHD8	0.454407696078153	2.59188374036334e-05	0.000399045360426724	79	79
ABI1	-0.271608	0.0154636688590801	0.0578131366198741	79	79
ABI2	0.365882158770482	0.000913248062351862	0.00657995367508087	79	79
ABI3BP	-0.547385	1.78676805957818e-07	8.57471321891859e-06	79	79
ABI3	-0.468707	1.32129712229701e-05	0.0002368293451828	79	79
ABL1	0.0947282461079888	0.406305621001059	0.578088038708193	79	79
ABL2	-0.115272	0.311726801203424	0.483580358969618	79	79
ABLIM1	0.231779520102039	0.0398457342207807	0.114800546734315	79	79
ABLIM2	0.43092964181713	7.3550409651744e-05	0.000900864422206922	79	79
ABLIM3	-0.156026	0.169717014335809	0.31737836562121	79	79
ABO	-0.379113	0.00057002462354322	0.00455736925147825	79	75
ABP1	-0.143514	0.207023441381682	0.364871465002087	79	65
ABRA	-0.0191968	0.866645813525404	0.922633822603147	79	40
ABR	0.422921556657555	0.000103191232305844	0.00118440263073888	79	79
ABT1	-0.219391	0.0520585575429908	0.13826043708891	79	79
ABTB1	0.0448624065084197	0.69462390973505	0.810988615410556	79	79
ABTB2	0.0867082736599424	0.447357033127766	0.615660785324395	79	79
ACAA1	0.0417470393788159	0.714886893187795	0.824639897068589	79	79
ACAA2	-0.167028	0.141217965697271	0.279268181420412	79	79
ACACA	0.101521765403364	0.373323268951159	0.54573484667539	79	79
ACACB	0.191871983196671	0.0902669316019749	0.20332663139788	79	79
ACAD10	-0.41536	0.000140978629478145	0.00151304253050994	79	79
ACAD11	0.106560448530165	0.349943766219315	0.522860973322123	79	79
ACAD8	-0.224546	0.0466481923015006	0.128405357117993	79	79
ACAD9	-0.0724365	0.525818931221165	0.682551723593351	79	79
ACADL	-0.390711	0.000370883704556977	0.00324271738071064	79	73
ACADM	-0.0914596	0.422763586321809	0.594074530223336	79	79
ACADSB	0.0305590530686632	0.789201303503231	0.87539297589496	79	79
ACADS	-0.282936	0.0115184346093834	0.0462939578855933	79	79
ACADVL	0.398914715523215	0.000271036279979822	0.00254067769886878	79	79
ACAN	0.352731858563351	0.00143101518529357	0.00927785239141057	79	77
ACAP1	-0.425032	9.44572936634024e-05	0.00110577958293361	79	79
ACAP2	-0.242038	0.0316298006851298	0.0971593929196611	79	79
ACAP3	0.193991089964448	0.0867010991283622	0.197635708036329	79	79
ACAT1	-0.274643	0.0143066142182466	0.0544987037583001	79	79
ACAT2	0.304381105595959	0.00638523503485471	0.0294515729964441	79	79
ACBD3	0.0468038220008108	0.682102826228948	0.802083581155704	79	79
ACBD4	-0.0671402	0.556594575555158	0.706094934492535	79	79
ACBD5	0.0441977285667515	0.6989297714236	0.814246236933463	79	79
ACBD6	0.409461273325985	0.000178924013319123	0.0018193430166098	79	79
ACBD7	0.252257751948028	0.0249108538996606	0.0816569346473622	79	79
ACCN1	-0.036352	0.750440624647813	0.849389692789179	79	51
ACCN2	0.23189885065822	0.0397408383709293	0.114585307856524	79	78
ACCN3	0.473783911277054	1.03257974443251e-05	0.000194261597833898	79	78
ACCN4	0.0433661918877692	0.704329948427569	0.817954650124714	79	45
ACCN5	-0.0895825	0.432385929919008	0.602668116175099	79	5
ACCSL	-0.225702	0.0455008098972256	0.126180909580204	79	14
ACCS	-0.087415	0.443649158179533	0.612563341128876	79	79
ACD	0.0637821821303735	0.576542965775268	0.722172341845446	79	79
ACE2	-0.204449	0.0707060985775264	0.171704664300522	79	79
ACER1	0.149674664291332	0.187985130783515	0.341301501314218	79	36
ACER2	-0.0403795	0.7238454799856	0.831255363869218	79	78
ACER3	-0.362561	0.0010247778227505	0.00717047868740766	79	79
ACE	-0.446618	3.69487658837088e-05	0.000528933480526224	79	79
ACHE	0.4163151846368	0.000135586745774268	0.00146658146715567	79	79
ACIN1	0.121073335011446	0.287833340344774	0.459109014620036	79	79
ACLY	0.221029820456744	0.0502855862139636	0.134941478753719	79	79
ACMSD	-0.163974	0.148739500050404	0.289952820378472	79	45
ACN9	-0.0105451	0.926511148654533	0.960080892415391	79	79
ACO1	-0.406908	0.000198097734887806	0.00198405499364586	79	79
ACO2	-0.290478	0.00940631898300759	0.0397374856119193	79	79
ACOT11	-0.502231	2.40603392628527e-06	6.13079000452664e-05	79	78
ACOT12	-0.147389	0.194895694091396	0.349946578929275	79	23
ACOT13	-0.129141	0.256673037735385	0.423698920263088	79	79
ACOT1	-0.0921068	0.419474900224015	0.591128284052204	79	79
ACOT2	-0.139611	0.219772221358071	0.379635116208029	79	79
ACOT4	0.00147950479831221	0.989675241270855	0.995229844948517	79	79
ACOT6	-0.0848975	0.456935193810999	0.624223115653368	79	75
ACOT7	-0.0509853	0.655427778602107	0.782226056042255	79	79
ACOT8	-0.207848	0.0660504957911974	0.163809459009651	79	79
ACOT9	0.0470473675593878	0.680538043776276	0.800827853156871	79	79
ACOX1	0.0956975457094079	0.401498127779367	0.573018507213709	79	79
ACOX2	0.0564968697167681	0.62092027176848	0.755766514407901	79	79
ACOX3	-0.0979486	0.39046319618226	0.562516338022431	79	79
ACOXL	0.10994785146554	0.334750276841868	0.507531385553601	79	51
ACP1	0.431634503925899	7.13615233915991e-05	0.000883300688075682	79	79
ACP2	0.057084797524901	0.617285405413429	0.753157513134548	79	79
ACP5	-0.22085	0.050478031400041	0.135232736843994	79	79
ACP6	0.147881974609586	0.193389468318377	0.34811470344129	79	79
ACPL2	0.266254537116292	0.0177023301769848	0.0636954540693742	79	79
ACPP	-0.377274	0.000609348545489244	0.00478667785124369	79	79
ACPT	0.104712889201241	0.358408507415538	0.530850171178726	79	53
ACRBP	-0.230255	0.0412057997456724	0.117580906450471	79	78
ACRC	0.177537817725763	0.117512199939186	0.24550998669373	79	79
ACRV1	0.0862875784808497	0.449572342160663	0.617786634744012	79	55
ACR	-0.0196882	0.863264642741175	0.920726751812404	79	55
ACSBG1	-0.176839	0.118986097853185	0.247493131047601	79	76
ACSBG2	0.117672897557748	0.301687064289171	0.473052361225277	79	47
ACSF2	-0.17047	0.13308768580665	0.267920874726826	79	79
ACSF3	-0.187062	0.0987907679632389	0.216844109909095	79	79
ACSL1	0.0453064102009513	0.691752963841942	0.809150981051359	79	79
ACSL3	-0.18348	0.105537211286451	0.226964268462132	79	79
ACSL4	-0.533553	4.12593536893828e-07	1.59591180070533e-05	79	79
ACSL5	-0.684846	3.39907936071577e-12	2.98809976528377e-09	79	79
ACSL6	-0.1477	0.193945304553495	0.348758920508099	79	79
ACSM1	-0.195839	0.0836831396111641	0.192739302141231	79	75
ACSM2A	-0.326011	0.00336766810014519	0.0180200344359061	79	29
ACSM2B	-0.283272	0.0114163642920746	0.0459738767039363	79	19
ACSM3	-0.290145	0.00949183136782981	0.0400026190136911	79	79
ACSM4	0.0141590537723649	0.901435088240329	0.944458237530091	79	10
ACSM5	-0.372496	0.000723347806935693	0.00548824895493774	79	77
ACSS1	-0.0364629	0.749703695587706	0.84906039363547	79	79
ACSS2	0.165599402993726	0.144699999620055	0.284144026517137	79	79
ACSS3	-0.117821	0.301072992792023	0.472437178751877	79	79
ACTA1	0.118429779144812	0.298566430496288	0.470093676578097	79	76
ACTA2	-0.279414	0.0126388582370192	0.0494008727372577	79	79
ACTBL2	-0.116569	0.306275970253159	0.478308887653109	79	3
ACTB	-0.445958	3.80604316287752e-05	0.000542038842194781	79	79
ACTC1	-0.246104	0.0287936625441071	0.0904302425467736	79	54
ACTG1	-0.0225026	0.843949214396915	0.908239820067683	79	79
ACTG2	-0.175774	0.121261324519527	0.25071563140984	79	76
ACTL6A	-0.0684227	0.549063789587134	0.700283605033445	79	79
ACTL6B	-0.123882	0.276712467449019	0.446328222280096	79	33
ACTL7A	0.0244127929832307	0.83089107478139	0.900857398596925	79	15
ACTL7B	0.132059166944132	0.245988574535378	0.411557888362264	79	43
ACTL8	-0.0906861	0.426713544316907	0.597368074345927	79	31
ACTN1	0.205282860468404	0.0695403867283421	0.169871312915596	79	79
ACTN2	0.203229129028361	0.0724396609617663	0.174686164962663	79	66
ACTN3	0.092199281060894	0.419006207362244	0.590830527621512	79	57
ACTN4	0.00489605111010937	0.965842093807943	0.982071165338938	79	79
ACTR10	0.247652168402261	0.0277716886409392	0.0880932357414736	79	79
ACTR1A	0.146574697089827	0.197400380620876	0.353165898354092	79	79
ACTR1B	0.409164073414653	0.000181064507022159	0.00183917414170618	79	79
ACTR2	-0.130132	0.253008429128083	0.41940370440877	79	79
ACTR3B	0.180443984204117	0.111530790063686	0.236535217197808	79	79
ACTR3C	-0.425081	9.42637490087588e-05	0.00110421617554779	79	77
ACTR3	0.147452285548181	0.194701288008209	0.349781823358565	79	79
ACTR5	-0.221445	0.0498439461814595	0.134128554215866	79	79
ACTR6	-0.220203	0.0511735571406005	0.136641805204917	79	79
ACTR8	-0.0470792	0.680333765257856	0.800636182310267	79	79
ACTRT1	0.0589574383290714	0.605769246292667	0.744649922030139	79	14
ACVR1B	-0.326961	0.00327088523338673	0.0176257788837279	79	79
ACVR1C	-0.23965	0.0334024994124002	0.101127792522827	79	74
ACVR1	-0.371323	0.000754142577741129	0.00567956287130585	79	79
ACVR2A	-0.0454408	0.69088458570052	0.808526436369845	79	79
ACVR2B	-0.300118	0.00720453602834579	0.0323284748928556	79	79
ACVRL1	-0.506138	1.94931088319934e-06	5.21072856461776e-05	79	79
ACY1	0.222812685386751	0.0484131354413226	0.131482006769273	79	79
ACY3	-0.345602	0.00181134524529369	0.0111600564013953	79	51
ACYP1	0.580613491147888	2.03526181256741e-08	1.75723051138633e-06	79	79
ACYP2	0.0994635289215056	0.383139936113301	0.55505066400234	79	79
ADAD2	-0.0315945	0.782232636625198	0.870948715735828	79	74
ADAL	-0.153172	0.177759328216484	0.328090928657232	79	79
ADAM10	-0.0549933	0.630257434501855	0.762633972549952	79	79
ADAM11	0.464249768306873	1.63538987464746e-05	0.000278910407192962	79	79
ADAM12	0.17135012743644	0.131066598877388	0.264899991878846	79	79
ADAM15	-0.217812	0.0538157401468535	0.141701588682249	79	79
ADAM17	0.0415140597479169	0.71641039660814	0.825658606185652	79	79
ADAM18	-0.0293934	0.79706665189702	0.880369448754333	79	9
ADAM19	0.207368363779467	0.066692587064043	0.164877238120745	79	79
ADAM20	0.296204979167708	0.00803661900799927	0.0350853750823264	79	68
ADAM21P1	0.0474708564637174	0.677820334885584	0.798796251092999	79	55
ADAM21	-0.161516	0.155007966867633	0.297773394954757	79	76
ADAM22	0.218997440517925	0.052492243589077	0.139190704582094	79	78
ADAM23	-0.19462	0.0856648886917389	0.195880698427315	79	78
ADAM28	-0.547755	1.74621729062564e-07	8.46412090243105e-06	79	78
ADAM29	-0.168837	0.136899123726198	0.273204937866542	79	20
ADAM2	-0.0780808	0.493987286856754	0.656696479721767	79	13
ADAM32	0.148135491636204	0.192618484668135	0.347180008712184	79	75
ADAM33	0.217919471596777	0.053694482732432	0.141512771984208	79	74
ADAM3A	0.119048234927033	0.296032271220772	0.467447524842982	79	3
ADAM5P	0.139321058354194	0.220742038184588	0.380834167572697	79	5
ADAM6	-0.324161	0.00356358303800027	0.0188935440052796	79	79
ADAM8	0.232084400215503	0.0395781900169727	0.114352253293902	79	79
ADAM9	-0.279017	0.0127709175306337	0.0497762081907409	79	79
ADAMDEC1	-0.145333	0.201263788310233	0.357958586161477	79	66
ADAMTS10	-0.186486	0.0998515530884538	0.218379400286181	79	79
ADAMTS12	-0.146562	0.197438532638784	0.353168814394569	79	74
ADAMTS13	0.504704513868925	2.10647386387152e-06	5.51463750214264e-05	79	79
ADAMTS14	0.0903610330367576	0.428379946374397	0.59896386371319	79	79
ADAMTS15	-0.461536	1.85946522513053e-05	0.000309218034858336	79	63
ADAMTS16	-0.39886	0.000271615448864557	0.00254384638307048	79	50
ADAMTS17	0.0247045219845754	0.8289007250928	0.899704794213422	79	79
ADAMTS18	-0.251402	0.0254227050868423	0.0828852185400421	79	59
ADAMTS19	0.175280531931083	0.122326053991768	0.252377414572305	79	35
ADAMTS1	-0.228155	0.0431433254545539	0.121631474386454	79	79
ADAMTS20	0.0580994983680684	0.611033618880727	0.748599403848553	79	24
ADAMTS2	-0.217308	0.0543865936868823	0.142621928393804	79	79
ADAMTS3	-0.0211416	0.853279195001963	0.914160183433302	79	79
ADAMTS4	-0.270554	0.0158842607817573	0.0589299066792989	79	79
ADAMTS5	-0.305153	0.00624593572116049	0.0289538467997539	79	79
ADAMTS6	-0.0939475	0.410202396241666	0.58251812492208	79	79
ADAMTS7	0.28820607689405	0.0100036495705433	0.0415797512775215	79	79
ADAMTS8	-0.303008	0.00663972713592399	0.0304294603812251	79	75
ADAMTS9	-0.196069	0.0833141283729199	0.192204131356314	79	79
ADAMTSL1	0.252926210764707	0.0245171865460979	0.0807497254430403	79	79
ADAMTSL2	-0.0876916	0.442202873021836	0.611308331968714	79	78
ADAMTSL3	-0.352756	0.00142986692436551	0.00927351653830616	79	79
ADAMTSL4	-0.372511	0.000722946198445435	0.00548735458317689	79	79
ADAMTSL5	-0.242743	0.0311217444644432	0.0958736122877241	79	79
ADAP1	-0.350905	0.00152090157517976	0.00971728987908049	79	79
ADAP2	-0.595529	7.07746801890026e-09	8.24567659551392e-07	79	79
ADARB1	0.0708862587166933	0.534737797047359	0.68963917010509	79	79
ADARB2	-0.144722	0.203186262595687	0.36039573719982	79	37
ADAR	0.0912732286624827	0.423713538187678	0.595025231286003	79	79
ADAT1	-0.212659	0.0598888739879455	0.152823700082711	79	79
ADAT2	-0.0611006	0.592706353346828	0.735039491742716	79	79
ADAT3	0.139613731780657	0.219764227021513	0.379635116208029	79	79
ADA	-0.228086	0.0432079365330835	0.12164612954447	79	79
ADCK1	-0.27972	0.0125379848412283	0.0490958952883893	79	79
ADCK2	-0.241932	0.0317072915513601	0.0973054615365446	79	79
ADCK4	0.142196024908443	0.211268779682565	0.369367040233305	79	79
ADCK5	0.237136589188762	0.0353579055147674	0.105558504361495	79	79
ADCY10	0.091119924399064	0.424495733537596	0.595366300908342	79	67
ADCY1	-0.135111	0.235146405179914	0.398609122287628	79	79
ADCY2	0.145528164429874	0.200654042803379	0.357169736568555	79	59
ADCY3	-0.282566	0.0116320666629409	0.0466246982924927	79	79
ADCY4	-0.517054	1.06759346919915e-06	3.24132773851044e-05	79	79
ADCY5	-0.399049	0.000269627543281439	0.00253258702625693	79	73
ADCY6	-0.148705	0.190893612430306	0.344924191221239	79	79
ADCY7	-0.476256	9.14455177830933e-06	0.000175104585537131	79	79
ADCY8	0.130326478016476	0.252294498161894	0.418558115875254	79	46
ADCY9	0.0547263260869937	0.631921310042848	0.763787146817617	79	79
ADCYAP1R1	0.152006918656043	0.181118866523808	0.332243088169444	79	38
ADCYAP1	-0.46398	1.65645160840252e-05	0.000281322509555684	79	57
ADC	-0.156615	0.168091456012563	0.315252982862972	79	79
ADD1	-0.20872	0.0648976568467655	0.161867511402688	79	79
ADD2	-0.189222	0.094887307250223	0.210788022308674	79	76
ADD3	-0.506083	1.95516281384487e-06	5.21556535444962e-05	79	79
ADH1A	-0.379182	0.000568589201068332	0.00454965459191624	79	45
ADH1B	-0.178462	0.11558337347858	0.242528202568703	79	77
ADH1C	-0.395503	0.000309098289948011	0.00282112360905829	79	66
ADH4	-0.36377	0.000982833066795629	0.00692669689212273	79	39
ADH5	-0.312544	0.00504276706673033	0.0246654312267488	79	79
ADH6	-0.489931	4.58991823547741e-06	0.000102860971812437	79	29
ADH7	-0.102749	0.367544957252575	0.540392236070002	79	6
ADHFE1	-0.0472417	0.679290740418506	0.799798059155845	79	79
ADI1	0.070476618144959	0.537107050009275	0.691483507202657	79	79
ADIG	0.186675881092468	0.0995004995457709	0.218030779652754	79	4
ADIPOQ	0.0844154581781518	0.459504206797826	0.626405255478252	79	17
ADIPOR1	0.0380384932725579	0.739266336864363	0.842213180664277	79	79
ADIPOR2	-0.0726125	0.524810921557695	0.681775344755255	79	79
ADK	-0.479813	7.66536577827312e-06	0.000152675771526058	79	79
ADM2	0.258879736999573	0.0212383207679663	0.0728376630649205	79	75
ADM	-0.12715	0.264139794848267	0.432480835791186	79	79
ADNP2	0.155586634201169	0.170937935425846	0.318863061750702	79	79
ADNP	0.0390431427879395	0.732635328327717	0.837718295486464	79	79
ADORA1	0.0803435382144113	0.481516397011978	0.644911850291666	79	78
ADORA2A	-0.392463	0.000347094760759188	0.00307504016174196	79	79
ADORA2B	0.127628309315872	0.262332495998233	0.430469240845565	79	78
ADORA3	-0.382389	0.000505660009640723	0.00415263889021299	79	79
ADO	0.216018731105865	0.0558692039139251	0.14528847703312	79	79
ADPGK	-0.0436934	0.702203235593461	0.816398431412098	79	79
ADPRHL1	0.0251525049709209	0.82584641672089	0.89810333442319	79	78
ADPRHL2	-0.197215	0.0814917146364293	0.18931528661484	79	79
ADPRH	-0.592353	8.90229380961084e-09	9.8383064158785e-07	79	79
ADRA1A	-0.218995	0.0524951912731021	0.139190704582094	79	37
ADRA1B	-0.111314	0.328743096357626	0.501569224010451	79	79
ADRA1D	0.140849077192586	0.215670570463783	0.374893837207404	79	73
ADRA2A	0.201600175666833	0.0748076000616366	0.178526528281349	79	77
ADRA2B	-0.303291	0.0065865892880877	0.0302289123947831	79	79
ADRA2C	0.362717895013279	0.00101924308128178	0.00713691571035109	79	79
ADRB1	-0.299181	0.00739657336856779	0.0329304164245168	79	72
ADRB2	-0.459986	1.99999173975077e-05	0.000328308489384211	79	78
ADRB3	0.151569385380916	0.182392874050798	0.333883405976568	79	39
ADRBK1	0.147667969225672	0.194042018568427	0.348900394116157	79	79
ADRBK2	-0.306072	0.00608370600874361	0.0284238572492811	79	79
ADRM1	0.0216640618453988	0.849695124605355	0.911565310137172	79	79
ADSL	0.0730762477408858	0.522159812792119	0.679809544220773	79	79
ADSSL1	0.272566742482396	0.0150897979431503	0.0567775665798689	79	79
ADSS	0.162271278503243	0.153062144944088	0.295637859105029	79	79
AEBP1	-0.169159	0.136140451193654	0.272112063464786	79	79
AEBP2	-0.144305	0.204504157242072	0.361972001994324	79	79
AEN	0.116809059931513	0.305274596770042	0.477091773861221	79	79
AES	0.161187706555686	0.155860996101497	0.29898754524593	79	79
AFAP1L1	-0.189085	0.09513114308238	0.211094123155065	79	79
AFAP1L2	-0.532122	4.48951233698834e-07	1.70249350190891e-05	79	79
AFAP1	-0.190261	0.0930545641045929	0.207742729976085	79	79
AFARP1	0.0664191811947496	0.560849808567535	0.709314366838617	79	74
AFF1	-0.225057	0.0461376714359442	0.127380808789602	79	79
AFF2	0.269811749174527	0.0161859886522308	0.0596829400446413	79	78
AFF3	0.402869543090255	0.000232324275513885	0.00225220625986894	79	79
AFF4	-0.0670711	0.55700175130662	0.706116001402715	79	79
AFG3L1	-0.109758	0.335589993534126	0.508206912140788	79	79
AFG3L2	0.175896123841661	0.120998517635139	0.250386403922917	79	79
AFMID	0.176033976694147	0.120702755241919	0.250015131881623	79	79
AFM	-0.271299	0.0155859669589234	0.0581850718247886	79	7
AFP	-0.103749	0.36287491248336	0.535162190158969	79	51
AFTPH	-0.212479	0.0601101838694359	0.153269404604524	79	79
AG2	-0.14416	0.204965260290108	0.362475140271643	79	79
AGAP11	-0.246014	0.0288543124458379	0.0905605956369578	79	79
AGAP1	0.271998867485343	0.0153103527362655	0.0573888753794113	79	79
AGAP2	-0.147931	0.193240225848083	0.347976347104461	79	79
AGAP3	0.0712386861876094	0.532703594363991	0.687844788549547	79	79
AGAP4	0.242411962507082	0.0313597353202628	0.0964684716230129	79	79
AGAP5	-0.0437694	0.701709679871682	0.816108317320243	79	79
AGAP6	0.264975355537554	0.0182766739017036	0.0651946871168863	79	79
AGAP7	0.144302778405636	0.204512309503205	0.361972001994324	79	79
AGAP8	0.35855153806266	0.00117580918863857	0.00799021423340475	79	79
AGA	-0.386511	0.000434131615673803	0.00368556433698047	79	79
AGBL1	-0.0748849	0.511885483702038	0.671313843818907	79	8
AGBL2	-0.142255	0.211076312920471	0.369205964621235	79	76
AGBL3	-0.378967	0.000573061652017809	0.00457653632517318	79	78
AGBL4	0.106274367129869	0.351246269319823	0.524280531654347	79	72
AGBL5	0.0860749328567797	0.450694413739278	0.618888807279014	79	79
AGER	0.315238708111985	0.00465804580597619	0.0231688037133252	79	79
AGFG1	0.12387530517278	0.276739051958332	0.446328222280096	79	79
AGFG2	-0.18045	0.111519169713194	0.236535217197808	79	79
AGGF1	-0.175292	0.122301527789869	0.252353733858536	79	79
AGK	-0.243818	0.0303607328252958	0.0940385286420917	79	79
AGL	-0.335766	0.00248529909263999	0.0142797636517104	79	79
AGMAT	0.176534439095462	0.119633676865529	0.24846599125637	79	78
AGPAT1	0.10236525753687	0.369344779239662	0.542214060307807	79	79
AGPAT2	0.298008112328981	0.00764327213275948	0.0337490600565224	79	79
AGPAT3	0.122771834734624	0.281073600853786	0.451379510131382	79	79
AGPAT4	0.155467999609272	0.171268461033395	0.319137878060108	79	79
AGPAT5	-0.118852	0.296834415221042	0.468290854912714	79	79
AGPAT6	0.00141912146128487	0.990096606129338	0.995346104716779	79	79
AGPAT9	-0.476231	9.15572292615996e-06	0.000175145085451962	79	79
AGPHD1	-0.0543104	0.634517364049284	0.765585240546082	79	79
AGPS	0.201470271736612	0.0749990731989935	0.178740859601791	79	79
AGR2	0.0541619367744045	0.635445081037609	0.766460293424935	79	23
AGRN	-0.204155	0.0711203937307501	0.172256532843169	79	79
AGRP	0.384958214325168	0.000459913963343971	0.00385053508704433	79	78
AGTPBP1	-0.251685	0.0252526906300431	0.082511748063023	79	79
AGTR1	0.23173387642037	0.0398859175028797	0.114800546734315	79	79
AGTR2	-0.111232	0.329099603186118	0.501836026619847	79	12
AGTRAP	-0.226647	0.0445805009506618	0.124234421957608	79	79
AGT	-0.314762	0.00472410725328717	0.0234087200303802	79	79
AGXT2L1	-0.136045	0.231894990549224	0.394688824889729	79	69
AGXT2L2	-0.356073	0.00127899568305783	0.00851196714051563	79	79
AGXT2	-0.221244	0.0500577965425828	0.134535545460471	79	14
AGXT	0.202972413836158	0.0728087916265646	0.175331656472426	79	60
AHCTF1	0.171870449113484	0.129882963218076	0.263002461379708	79	79
AHCYL1	-0.139167	0.221258409507974	0.381384816388967	79	79
AHCYL2	-0.186801	0.0992697010512749	0.217623670180419	79	79
AHCY	-0.0598454	0.600341739580698	0.740614227434503	79	79
AHDC1	0.115309676395045	0.311567165187817	0.483449051246179	79	79
AHI1	-0.166232	0.143149251417793	0.281967528086501	79	79
AHNAK2	-0.259508	0.0209153044552238	0.0719754427338127	79	79
AHNAK	-0.210278	0.0628780257033906	0.158197088214333	79	79
AHRR	-0.307073	0.00591133712559297	0.0278302720795621	79	79
AHR	-0.236869	0.0355712477800161	0.105968566245458	79	79
AHSA1	0.159874710558887	0.159303248951067	0.30344970301523	79	79
AHSA2	0.0671198132859045	0.556714606036624	0.7060987192887	79	79
AHSG	0.070044264987217	0.539613264630824	0.693429936077085	79	13
AHSP	0.0264610152512802	0.816940053414393	0.892533082873933	79	33
AICDA	-0.135754	0.232906233124333	0.395853227054801	79	13
AIDA	0.193783621469732	0.087045206051471	0.198244104891574	79	79
AIF1L	0.259579014708867	0.0208789849027463	0.0719144377594145	79	79
AIF1	-0.49597	3.35294082589465e-06	7.97045385355898e-05	79	79
AIFM1	-0.317164	0.00439935431708706	0.0221976291396984	79	79
AIFM2	0.152074779837404	0.180921850201714	0.331952943098745	79	79
AIFM3	0.204486267226972	0.0706536553312321	0.171650006752692	79	78
AIG1	0.0710859077485315	0.533584956173625	0.68868937789319	79	79
AIM1L	0.0075331675595081	0.947465445198128	0.972713754651863	79	71
AIM1	-0.532612	4.36182724737301e-07	1.6638607290768e-05	79	79
AIM2	-0.359057	0.00115570698534815	0.00788964811035415	79	63
AIMP1	0.0320875095450991	0.778920224766249	0.86906631825975	79	79
AIMP2	0.232799798976245	0.0389562641730096	0.11324659310108	79	79
AIPL1	-0.203791	0.0716365471587786	0.17325356165311	79	27
AIP	-0.0534258	0.640053033131977	0.770150293086073	79	79
AIRE	0.218744997715611	0.0527717913253938	0.139809101949742	79	24
AJAP1	0.251036845289672	0.0256437248693672	0.0833809076956225	79	71
AK1	0.193872654730027	0.0868974034896959	0.198020005124393	79	79
AK2	-0.00473286	0.966979944752701	0.982887062149431	79	79
AK3L1	0.192579193631829	0.0890642650454014	0.201297520857551	79	79
AK3	-0.00533848	0.962757569686305	0.980656838770377	79	79
AK5	-0.0293778	0.797171442971042	0.880404401163844	79	62
AK7	0.227748267763104	0.043527000680984	0.122232059411969	79	77
AKAP10	-0.0644767	0.572389937920734	0.718692553358891	79	79
AKAP11	0.0439804508500937	0.700339391745294	0.81512866495287	79	79
AKAP12	-0.108303	0.342076844383252	0.515005929501176	79	79
AKAP13	-0.424378	9.70870782980208e-05	0.00112582445563711	79	79
AKAP14	0.227466990293309	0.0437940361721016	0.122690615527177	79	38
AKAP1	-0.22298	0.0482400844869128	0.131310799996748	79	79
AKAP2	-0.456684	2.33294874709913e-05	0.000368621150072689	79	73
AKAP3	-0.138366	0.223953937606364	0.384659782709333	79	78
AKAP4	0.0231936376476857	0.839220256772072	0.905411035591961	79	39
AKAP5	-0.0881998	0.439552005015134	0.608993178379017	79	78
AKAP6	-0.398657	0.000273756858681308	0.00255550629534485	79	79
AKAP7	0.425616486621633	9.21646867925704e-05	0.0010862066072933	79	79
AKAP8L	0.407334448392104	0.000194770150697872	0.00195579164823304	79	79
AKAP8	0.306553702338617	0.00600019977005624	0.0281250275213009	79	79
AKAP9	-0.202403	0.0736336270931677	0.176574624672271	79	79
AKD1	-0.228119	0.0431771871418823	0.12164612954447	79	79
AKIRIN1	-0.0429491	0.70704421377085	0.819616211799712	79	79
AKIRIN2	0.488506259836241	4.93842232232146e-06	0.000108656527546868	79	79
AKNAD1	-0.254515	0.0236028952738027	0.0785139309589516	79	65
AKNA	-0.458655	2.12848649727918e-05	0.000344764898303009	79	79
AKR1A1	-0.294427	0.00844173760220132	0.0364085213059443	79	79
AKR1B10	-0.283226	0.0114302667351292	0.046016102967818	79	70
AKR1B15	-0.254759	0.0234646517708608	0.0782380657051823	79	26
AKR1B1	0.0108332511707189	0.924508600937425	0.95897003712147	79	79
AKR1C1	-0.445853	3.82401736564926e-05	0.000543549892937095	79	79
AKR1C2	-0.421469	0.000109627198441084	0.00124205624947309	79	78
AKR1C3	-0.376281	0.00063157644555485	0.00493318436803452	79	79
AKR1C4	0.00352548608131083	0.975400461948355	0.987088322645659	79	7
AKR1CL1	0.0414796624715876	0.716635421676277	0.825819523042316	79	3
AKR1D1	-0.494049	3.7076722762011e-06	8.66019104127165e-05	79	63
AKR1E2	0.00462943822880669	0.967701126453306	0.983232294640909	79	77
AKR7A2	0.177079844436278	0.118476889017507	0.246869287941051	79	79
AKR7A3	0.221563451557144	0.0497190037749013	0.133960090973334	79	79
AKR7L	0.275147021768132	0.0141218599113973	0.0539330115889462	79	79
AKT1S1	0.339876532920117	0.00218020697170544	0.0128617922404638	79	79
AKT1	0.142217922365943	0.211197749397689	0.369309626885289	79	79
AKT2	0.366949087983533	0.000879832221944536	0.00639388699255671	79	79
AKT3	-0.170259	0.133574835604665	0.268677828454938	79	79
AKTIP	-0.239534	0.0334912863581108	0.101301451073798	79	79
ALAD	-0.058718	0.607236607873251	0.745600660038643	79	79
ALAS1	0.202423139530743	0.0736036618564394	0.176524655295578	79	79
ALAS2	-0.155472	0.171256480892278	0.319137878060108	79	63
ALB	-0.0811218	0.477266107773342	0.641306643808548	79	72
ALCAM	0.225685539195585	0.0455169544470303	0.126186119991112	79	79
ALDH16A1	-0.0641872	0.574119626570982	0.720163028789907	79	79
ALDH18A1	-0.0252046	0.825491681926552	0.897869024715118	79	79
ALDH1A1	-0.314007	0.00483050514611034	0.023850387931012	79	79
ALDH1A2	-0.0551236	0.629445979049772	0.76204710584907	79	74
ALDH1A3	-0.158239	0.163670614339719	0.309240883287432	79	79
ALDH1B1	0.270819558188233	0.0157772824749739	0.0587019321019614	79	79
ALDH1L1	0.206046050615863	0.068487086843703	0.168088865426043	79	79
ALDH1L2	-0.14384	0.205984052851246	0.363744666010144	79	79
ALDH2	-0.222517	0.048719412500648	0.132055239519163	79	79
ALDH3A1	-0.102032	0.370914759086572	0.543930886799415	79	74
ALDH3A2	0.280299145122625	0.0123487787762961	0.0485386218497686	79	79
ALDH3B1	-0.452687	2.80507999892764e-05	0.000423499197340052	79	79
ALDH3B2	-0.490417	4.47638249752252e-06	0.000101136959698698	79	63
ALDH4A1	-0.0502102	0.660341297235262	0.786149626871651	79	79
ALDH5A1	-0.140698	0.216168221704139	0.375387753233191	79	79
ALDH6A1	-0.178983	0.11450857617927	0.241047370757828	79	79
ALDH7A1	-0.205946	0.0686239801014146	0.168296699868293	79	79
ALDH8A1	0.281652868651317	0.0119162811161363	0.0473420042699417	79	79
ALDH9A1	-0.0705317	0.536787932918004	0.691269051979904	79	79
ALDOA	-0.143412	0.207350601080966	0.365124339880349	79	79
ALDOB	-0.0518551	0.649931469781478	0.777970825374375	79	79
ALDOC	0.351987650581605	0.00146702785034479	0.00945428811251855	79	79
ALG10B	-0.018688	0.870149088581321	0.924530142784599	79	79
ALG10	-0.0450932	0.693131072465984	0.810147996118404	79	79
ALG11	-0.0192737	0.866116299386618	0.92239478139522	79	78
ALG12	-0.0660803	0.562855290082226	0.711199615196017	79	79
ALG13	-0.275379	0.0140374592324384	0.0536442318184331	79	79
ALG14	-0.0616449	0.589409149921894	0.732217287788586	79	79
ALG1L2	0.0828850718713169	0.467711783274086	0.633649840129669	79	14
ALG1L	-0.0898406	0.431055582773133	0.601530772121538	79	78
ALG1	0.0309795397594261	0.786369250749237	0.873743611943596	79	79
ALG2	0.458234088459199	2.1706616339856e-05	0.000349838300010679	79	79
ALG3	0.0634374302133199	0.578609542850145	0.723589302212855	79	79
ALG5	0.202529139332659	0.0734497272616288	0.176258053071897	79	79
ALG6	-0.264755	0.018377395560481	0.065466721337208	79	79
ALG8	0.00436415348489077	0.969551069125313	0.984008974246383	79	79
ALG9	0.0879785911490547	0.440704819466451	0.610039848969911	79	79
ALKBH1	-0.0314587	0.783145399684914	0.871363020935809	79	79
ALKBH2	0.127621809662367	0.26235699858236	0.43047292377898	79	79
ALKBH3	-0.137924	0.225451773840667	0.386556866170022	79	79
ALKBH4	-0.0930545	0.414685628578283	0.58723424937277	79	79
ALKBH5	0.253197729841698	0.0243588000168569	0.0803512182033111	79	79
ALKBH6	0.430894430555922	7.36613704760239e-05	0.000901652471522976	79	79
ALKBH7	0.0628063237404333	0.5824014562198	0.726405530974521	79	79
ALKBH8	-0.287753	0.0101266954856015	0.0419649219394756	79	79
ALK	0.106136271643544	0.35187608207566	0.52477509464399	79	74
ALLC	0.387555116422013	0.000417549736935822	0.00356687805315318	79	61
ALMS1P	0.0586985814066173	0.607355511157914	0.745679402379146	79	61
ALMS1	0.124289927280507	0.275121979245594	0.444590497878492	79	79
ALOX12B	0.347064228583328	0.00172662884926669	0.0107372996607131	79	44
ALOX12P2	-0.260839	0.0202444268820574	0.0703173879128935	79	44
ALOX12	0.0129678463974905	0.909690990008359	0.949763752254463	79	74
ALOX15B	0.178193756783768	0.116141051180756	0.243355138660436	79	77
ALOX15	0.0453647367167293	0.691376143738121	0.808989259435214	79	31
ALOX5AP	-0.438406	5.32028152161731e-05	0.000704755100192321	79	79
ALOX5	-0.443614	4.22652697316696e-05	0.000590614390614516	79	79
ALOXE3	-0.317297	0.0043819899119119	0.022121557007668	79	66
ALPI	0.210953661872624	0.0620173770018514	0.15654086024743	79	18
ALPK1	-0.283778	0.011263865938169	0.0455167503644356	79	79
ALPK2	-0.34859	0.00164204359571449	0.0103198869133299	79	50
ALPK3	-0.55985	8.13205633903148e-08	4.79493809746551e-06	79	79
ALPL	0.457827139753378	2.21221658268454e-05	0.000354280841125179	79	79
ALPPL2	0.0192856279236617	0.866034302710682	0.922358247393832	79	9
ALPP	0.170646636201921	0.132679926917138	0.267342776720514	79	14
ALS2CL	-0.0854329	0.454091689113925	0.621831995147158	79	79
ALS2CR11	0.0688667347247247	0.546468008078266	0.698381251196656	79	75
ALS2CR12	0.264426381930453	0.018528021058504	0.0657938890670091	79	74
ALS2CR4	0.444110735900158	4.1340259725474e-05	0.00058038959156555	79	79
ALS2CR8	-0.0178914	0.875639010922375	0.928573683794442	79	79
ALS2	0.353422527984246	0.00139831001282564	0.00911818905768392	79	79
ALX1	0.153199441590667	0.177679386864225	0.328018264791343	79	21
ALX3	0.131263452269073	0.248870905158353	0.414892104625683	79	78
ALX4	0.142970912813828	0.208765514789691	0.366614460731192	79	62
AMAC1L2	0.0107704393014147	0.924945033117578	0.959216952141882	79	64
AMAC1L3	-0.0987164	0.386741284145426	0.558969915206079	79	33
AMAC1	-0.138691	0.22285744586192	0.383218903082558	79	4
AMACR	0.0906234361380389	0.427034608338838	0.597601253637708	79	79
AMBN	-0.257972	0.0217126261949659	0.0739950996670731	79	8
AMBP	-0.200564	0.0763462920248494	0.181184166663279	79	43
AMBRA1	0.199053343403124	0.0786336136940712	0.184851597039424	79	79
AMD1	-0.24137	0.0321180222798394	0.0981815921673016	79	79
AMDHD1	0.41153562700382	0.000164621453755974	0.00171191980471348	79	78
AMDHD2	-0.249683	0.0264775497833579	0.0852749063797071	79	79
AMELX	-0.138887	0.222197328835231	0.382457844399553	79	3
AMFR	0.417913829319422	0.000126983845800845	0.00139479988042935	79	79
AMHR2	0.015808165884508	0.890022997918373	0.937631810640665	79	79
AMH	0.385280952466998	0.000454443173090974	0.0038146401769008	79	77
AMICA1	-0.53886	3.00591407396932e-07	1.25560212074658e-05	79	79
AMIGO1	-0.00369712	0.974203253919358	0.986496844342395	79	79
AMIGO2	-0.186593	0.0996533604879322	0.218145383029941	79	79
AMIGO3	0.559601068735783	8.26366561010409e-08	4.85772926745936e-06	79	79
AMMECR1L	0.320178982995325	0.00401994887031817	0.0206890498014979	79	79
AMMECR1	-0.342132	0.00202749128871994	0.0121926870409961	79	79
AMN1	-0.148086	0.192769019020097	0.347418957026248	79	79
AMN	0.134174911263469	0.238436575146382	0.402198338021608	79	61
AMOTL1	0.0150161161288806	0.895501452861527	0.940638906675738	79	79
AMOTL2	0.00806383004545061	0.943770543132925	0.970775571970576	79	79
AMOT	0.297836245681645	0.00768002056524156	0.033880382694291	79	79
AMPD1	-0.190983	0.0917976222074127	0.205863406017087	79	11
AMPD2	-0.102369	0.36932913601862	0.542214060307807	79	79
AMPD3	-0.440586	4.83390678936098e-05	0.000655321197642246	79	79
AMPH	0.163545969249383	0.149817817333523	0.291279987443515	79	72
AMT	-0.0475093	0.677574000530015	0.798651948455051	79	79
AMY1A	-0.280413	0.0123120009061866	0.0484464084487585	79	71
AMY2A	-0.22798	0.0433078008352787	0.121793350029706	79	70
AMY2B	-0.321421	0.0038723587638184	0.0201158792619522	79	79
AMZ1	0.131196995809668	0.249112674654363	0.41515201446061	79	66
AMZ2P1	0.00585759053030345	0.959139075299066	0.978663866497627	79	79
AMZ2	0.0399703876672806	0.72653251671492	0.833209744695685	79	79
ANAPC10	-0.127262	0.263714840483341	0.432077686796664	79	79
ANAPC11	0.116360117852249	0.30714997234733	0.479402829892452	79	79
ANAPC13	-0.0249372	0.827314175950231	0.898840299021261	79	79
ANAPC16	0.330959961219306	0.00289009594884741	0.01603858124841	79	79
ANAPC1	-0.00399293	0.972140018244976	0.985132974371753	79	79
ANAPC2	0.343743135342267	0.00192441183455647	0.011692781929099	79	79
ANAPC4	-0.283862	0.0112386786335128	0.0454624649178284	79	79
ANAPC5	-0.0782284	0.493168818153399	0.655975580679968	79	79
ANAPC7	0.157003779387209	0.16702580214965	0.313914720441088	79	79
ANGEL1	0.114665011714119	0.314298264536666	0.486213062469407	79	79
ANGEL2	-0.0240993	0.833030954262856	0.902014247374506	79	79
ANGPT1	-0.392557	0.000345852926886764	0.00306825486513303	79	79
ANGPT2	0.0778072842116794	0.495506095664204	0.658088716532461	79	79
ANGPT4	-0.218573	0.0529630763055616	0.140123925547136	79	51
ANGPTL1	-0.332585	0.00274707735994872	0.0154623038828313	79	79
ANGPTL2	-0.392416	0.000347711185397566	0.00307909080841984	79	79
ANGPTL3	-0.019923	0.861650049418278	0.919714786462121	79	38
ANGPTL4	0.252954431707506	0.0245006836551845	0.0807198294205739	79	79
ANGPTL5	-0.227681	0.0435911676772585	0.122348013646946	79	58
ANGPTL6	0.0883843766176627	0.438591636894257	0.608058281579119	79	78
ANGPTL7	0.00785575615739441	0.945219185064348	0.971232549099165	79	21
ANG	0.186129911438155	0.100512089035845	0.219501332650546	79	78
ANK1	-0.321976	0.00380785594975041	0.0198715418424644	79	79
ANK2	-0.261128	0.0201014670354347	0.070009431382191	79	79
ANK3	-0.488897	4.84053688395479e-06	0.000106989695240784	79	77
ANKAR	-0.25043	0.0260149555143734	0.0842027081031558	79	79
ANKDD1A	0.0748455906161592	0.512107821482271	0.67142331146818	79	79
ANKFN1	0.0140932850153333	0.90189064748339	0.944839750942987	79	46
ANKFY1	-0.336502	0.00242801250940915	0.014020085823858	79	79
ANKHD1-EIF4EBP3	-0.067079	0.556954982718559	0.706116001402715	79	79
ANKHD1	0.0360516762239243	0.752435651006902	0.850552661784645	79	79
ANKH	-0.249857	0.0263693812918292	0.0850023745856118	79	79
ANKIB1	-0.231956	0.0396907670938916	0.114518787945079	79	79
ANKK1	0.0477816263204464	0.675828601176011	0.797337910288218	79	77
ANKLE1	0.299348049012106	0.00736202651378662	0.0328219439319118	79	78
ANKLE2	-0.159438	0.160461844040871	0.304995780221175	79	79
ANKMY1	0.385613621803942	0.000448866396292857	0.00378425287894675	79	79
ANKMY2	-0.173408	0.126432268719862	0.258423174491876	79	79
ANKRA2	-0.0877951	0.441662260502124	0.610803779496547	79	79
ANKRD10	0.0498139828192757	0.662858490675247	0.788127579592972	79	79
ANKRD11	-0.100313	0.379072029602642	0.551060863853543	79	79
ANKRD12	-0.0310068	0.786185570122122	0.873684817223852	79	79
ANKRD13A	-0.287357	0.0102353028120195	0.042250323861131	79	79
ANKRD13B	0.299299495741074	0.0073720564393933	0.0328453743244678	79	79
ANKRD13C	-0.126315	0.267316111281528	0.435726387879035	79	79
ANKRD13D	0.144726583275412	0.203171973043871	0.36039573719982	79	79
ANKRD16	0.310900286268622	0.00529092783837513	0.0255433211168685	79	79
ANKRD17	-0.0529993	0.642729427030251	0.772265601314927	79	79
ANKRD19	0.150138596561594	0.186604506639508	0.339504342277337	79	79
ANKRD1	0.057012928223433	0.617729247297096	0.753508902095606	79	71
ANKRD20A3	0.151498667884784	0.18259939899234	0.334080482020687	79	77
ANKRD20A4	0.228398273374968	0.0429150621782557	0.121182260552995	79	54
ANKRD20B	0.0520591572870866	0.648644685804707	0.776959508451817	79	74
ANKRD22	-0.383969	0.000477063495755539	0.00396664144794158	79	69
ANKRD23	0.345743670918039	0.00180296613604215	0.0111190577394947	79	79
ANKRD24	0.260157085368734	0.02058586758421	0.0712092074903633	79	79
ANKRD26P1	-0.0962767	0.398641844328782	0.569993587854403	79	38
ANKRD26	0.118608003261149	0.297834694587454	0.469332925390806	79	79
ANKRD27	0.0134505698378465	0.906344175800783	0.94775325006689	79	79
ANKRD28	-0.0573805	0.615460465930153	0.751784589849628	79	79
ANKRD29	0.197073330593254	0.0817146630420705	0.189650976027078	79	79
ANKRD2	0.0500769406624898	0.661187460173423	0.7868179596206	79	61
ANKRD30B	0.0220691364020387	0.846918474456105	0.909966849776726	79	25
ANKRD31	-0.159298	0.160831825117285	0.305548870114763	79	61
ANKRD32	-0.104144	0.361039645354373	0.533300751634734	79	79
ANKRD33	-0.295639	0.00816369270765527	0.0355038940782669	79	45
ANKRD34A	0.373998470527208	0.000685552978071409	0.00525300895241722	79	79
ANKRD34B	0.316189971563806	0.00452861127505927	0.0226782346089193	79	36
ANKRD34C	-0.196663	0.0823656355694404	0.190681277461453	79	28
ANKRD35	-0.248814	0.0270249577960447	0.0864762878516718	79	74
ANKRD36BP1	-0.128182	0.260252408408153	0.428000134235858	79	78
ANKRD36B	-0.0264944	0.816712815611014	0.892335227044631	79	77
ANKRD36	-0.0153275	0.893346826192194	0.939546882296864	79	79
ANKRD37	0.341869126480167	0.00204480445293831	0.0122853426902227	79	79
ANKRD39	0.191570710278404	0.0907831450160538	0.204227756730311	79	79
ANKRD40	-0.324583	0.0035179661006519	0.0187121739237095	79	79
ANKRD42	0.145447655239189	0.200905925271136	0.357519377506788	79	79
ANKRD43	0.398904288578045	0.000271145748214331	0.00254067769886878	79	67
ANKRD44	0.163380007087242	0.150237285996202	0.29190165874689	79	78
ANKRD45	-0.252515	0.0247585808374464	0.0813824881239761	79	76
ANKRD46	-0.0381453	0.738560400660003	0.841607244211905	79	79
ANKRD49	-0.0326897	0.774880167128533	0.866203250232116	79	79
ANKRD50	-0.23525	0.0368877375533041	0.108784514223986	79	79
ANKRD52	-0.202545	0.0734266552597077	0.176253135499907	79	79
ANKRD53	-0.0839358	0.462068300079423	0.628880586340852	79	78
ANKRD54	0.0603924188359794	0.597008932683188	0.738480926922161	79	79
ANKRD55	-0.246487	0.0285377791169375	0.0899039987166593	79	49
ANKRD56	0.182556406484181	0.107332913768718	0.229808806777131	79	71
ANKRD57	-0.22514	0.0460556858253802	0.127227105251086	79	79
ANKRD58	0.144410661648103	0.204170518425808	0.361532487305908	79	79
ANKRD5	-0.307192	0.00589107289789061	0.0277547746273336	79	79
ANKRD6	-0.122395	0.282562300586942	0.452867729622231	79	79
ANKRD7	-0.281527	0.0119560403166108	0.0474609646394198	79	72
ANKRD9	0.151877169569273	0.181495991966917	0.332650917801382	79	79
ANKS1A	-0.159231	0.16101091016843	0.305678904746975	79	79
ANKS1B	0.00851904611213253	0.940601902053438	0.969062475267073	79	78
ANKS3	-0.0855983	0.453214977079356	0.621185917432368	79	79
ANKS4B	-0.22855	0.0427729746722982	0.12089056929022	79	19
ANKS6	0.355904304995386	0.00128629084460076	0.0085516895615602	79	79
ANKZF1	0.410522122025197	0.000171472327313861	0.00176491474733905	79	79
ANLN	0.0276114446217923	0.809128724702888	0.887508480929779	79	79
ANO10	-0.409586	0.000178032263958057	0.00181313532646068	79	79
ANO1	-0.384769	0.000463145780174711	0.00387256350565452	79	79
ANO2	-0.267121	0.0173220091603347	0.0626885586004626	79	79
ANO3	-0.0763757	0.503495561574985	0.664497495837739	79	67
ANO4	0.528011767886121	5.70998121955037e-07	2.01884893576059e-05	79	79
ANO5	-0.0517019	0.650898405728616	0.778790841796055	79	77
ANO6	-0.463165	1.72171630948336e-05	0.000289526288801112	79	79
ANO7	0.0831563639810309	0.466251041885296	0.632136352384242	79	79
ANO8	0.0760352352576724	0.505405291808729	0.666067348795968	79	79
ANO9	-0.408646	0.000184850537416071	0.00187467718596057	79	63
ANP32A	0.364915962172167	0.000944499323403824	0.00675041275485217	79	79
ANP32B	0.399466964326087	0.000265296136851356	0.00249796849401423	79	79
ANP32C	0.233181842080184	0.0386274855036017	0.112661072182123	79	63
ANP32D	-0.0881135	0.440001849096248	0.609330390080989	79	24
ANP32E	0.401236736842814	0.000247645074030067	0.00236633188327149	79	79
ANPEP	-0.299577	0.00731492787962398	0.0326722182891288	79	79
ANTXR1	0.353384223091082	0.00140010600941683	0.00912333228508136	79	79
ANTXR2	0.0308347902531874	0.787343853778269	0.874374397477561	79	79
ANTXRL	0.270353368121109	0.0159652213232362	0.0591657561529555	79	29
ANUBL1	0.0395578012661267	0.729245946097886	0.835274894731011	79	79
ANXA10	-0.0456698	0.689406576627201	0.807383019981232	79	7
ANXA11	-0.216999	0.0547384931634195	0.143369780306139	79	79
ANXA13	-0.199458	0.0780160283873346	0.18384671487889	79	34
ANXA1	-0.408548	0.000185573479043936	0.00188102258108476	79	79
ANXA2P1	-0.0988706	0.385996535990856	0.558333056904261	79	77
ANXA2P2	-0.137018	0.228544518804571	0.390532867439512	79	79
ANXA2P3	-0.012489	0.91301258938238	0.951661443253841	79	67
ANXA2	-0.113831	0.317854457564471	0.490116716290053	79	79
ANXA3	-0.501689	2.47680527895581e-06	6.26162275751704e-05	79	73
ANXA4	-0.428871	8.03051994836812e-05	0.000972512559808637	79	79
ANXA5	0.00993937327769686	0.930721518309901	0.962729537578943	79	79
ANXA6	-0.265552	0.018015947640379	0.0645476893969859	79	79
ANXA7	0.169010778520926	0.136489705871422	0.27261292074288	79	79
ANXA8L1	0.0420285846290418	0.713047294374398	0.823533747680715	79	4
ANXA8L2	-0.210662	0.0623879377411004	0.157337437778057	79	65
ANXA8	-0.133585	0.240524297269171	0.404604671582654	79	57
ANXA9	-0.173897	0.125349580274863	0.256780095595366	79	78
AOAH	-0.546846	1.84727608254994e-07	8.7137364479307e-06	79	79
AOC2	0.411525488649223	0.000164688716628496	0.00171191980471348	79	79
AOC3	0.214819717868856	0.0572776679447888	0.148094932894681	79	79
AOX1	0.0239975250767102	0.833726113140357	0.902405745275997	79	79
AOX2P	0.123014827765453	0.280115241071152	0.450364017151556	79	18
AP1AR	0.127085419587869	0.264384440034008	0.432734856995406	79	79
AP1B1	-0.299585	0.00731327752039725	0.0326722182891288	79	79
AP1G1	-0.0945705	0.407090999613519	0.578992493934804	79	79
AP1G2	0.130380222010198	0.252097258212786	0.418406863015393	79	79
AP1M1	0.419302133853194	0.00011992496111007	0.00133372555944149	79	79
AP1M2	0.366673017689578	0.000888370378393416	0.00643486259105943	79	56
AP1S1	0.467244953896052	1.41751089122963e-05	0.000248771875103276	79	79
AP1S2	-0.52138	8.36115963398664e-07	2.66400045010382e-05	79	79
AP1S3	-0.287351	0.0102370743336742	0.042250323861131	79	79
AP2A1	0.228074463669398	0.0432190110617193	0.12164612954447	79	79
AP2A2	-0.0656455	0.565432988388739	0.713477784004581	79	79
AP2B1	0.0902688611281156	0.428853083927145	0.599495384398336	79	79
AP2M1	0.14744843010061	0.194713087398051	0.349781823358565	79	79
AP2S1	-0.00652297	0.954502245179087	0.97620694985529	79	79
AP3B1	-0.340467	0.00213924273705853	0.0127027800229389	79	79
AP3B2	-0.0713386	0.532127521595399	0.687516540627953	79	78
AP3D1	0.382005648731177	0.000512832696727654	0.00420470656487232	79	79
AP3M1	0.0940122592410909	0.409878276903977	0.582143341067997	79	79
AP3M2	-0.0567059	0.619627062089653	0.754919200000875	79	79
AP3S1	0.073294661503164	0.520913603220779	0.678815514902482	79	79
AP3S2	0.170079932593209	0.133990485370921	0.269373803230105	79	79
AP4B1	0.14289886701044	0.208997365322821	0.366921663520639	79	79
AP4E1	0.151223011409053	0.183406054830568	0.335198743188734	79	79
AP4M1	-0.138706	0.222805632811913	0.383164332633563	79	79
AP4S1	0.191759606019504	0.0904592118350429	0.203664861104742	79	79
APAF1	-0.393282	0.000336454936311694	0.00300216481478399	79	79
APBA1	-0.488382	4.9700242581282e-06	0.00010881469223843	79	79
APBA2	0.259525804256738	0.0209061442079643	0.0719649882637336	79	79
APBA3	0.12978475927897	0.254288489972554	0.420876285500144	79	79
APBB1IP	-0.474005	1.02143923071619e-05	0.000192728143629767	79	79
APBB1	-0.152636	0.179299612748949	0.330001380906422	79	79
APBB2	-0.687317	2.64702590455805e-12	2.43778480924537e-09	79	79
APBB3	0.0693109262714185	0.54387728028855	0.696502887086515	79	79
APC2	0.38641873788972	0.000435627794958802	0.00369035416447933	79	78
APCDD1L	-0.220505	0.0508479125497679	0.135978792687018	79	58
APCDD1	0.49516389994152	3.49773807713177e-06	8.23949505623976e-05	79	79
APCS	-0.0900741	0.429853814908412	0.600416927656268	79	13
APC	-0.18984	0.0937941634278212	0.208935627815487	79	79
APEH	0.0293639634250457	0.797265250611581	0.880404401163844	79	79
APEX1	0.408000771304025	0.000189671797394683	0.00191453682756429	79	79
APEX2	-0.559317	8.41620339338028e-08	4.93240526145378e-06	79	79
APH1A	0.0216813775242188	0.84957639378294	0.91152859516861	79	79
APH1B	-0.306154	0.0060695116229204	0.0283722508833812	79	79
API5	0.0642819877055791	0.573553011999424	0.719825778849374	79	79
APIP	-0.231482	0.040108158467287	0.115224566957417	79	79
APITD1	-0.228993	0.042361217189685	0.120038965633481	79	79
APLF	-0.0240435	0.833411939380424	0.902170990015527	79	79
APLNR	-0.561939	7.10472161463392e-08	4.26724583934845e-06	79	78
APLN	0.0504692009921436	0.658697820557657	0.784821084868475	79	79
APLP1	0.0728805619314046	0.523277617508407	0.680766011760773	79	79
APLP2	-0.023644	0.836141315478938	0.903521748565885	79	79
APOA1BP	0.0509687977217278	0.65553229184014	0.782302512908077	79	79
APOA1	0.435227239888687	6.11131353759027e-05	0.000782733800112556	79	77
APOA2	-0.0952295	0.403815552695542	0.575476588986205	79	13
APOA4	-0.0278744	0.807346187699808	0.886256968447854	79	29
APOA5	0.122043416361327	0.283959530543013	0.454354043244963	79	20
APOB48R	-0.403155	0.000229738178999692	0.00223049015153315	79	79
APOBEC1	0.123422154833548	0.27851363867109	0.448310759209228	79	17
APOBEC2	0.453347275829799	2.7214401384257e-05	0.000414104266539363	79	68
APOBEC3A	0.161051298330485	0.156216017196659	0.299367595380835	79	74
APOBEC3B	0.344671762543052	0.00186715100234887	0.0114202088505462	79	79
APOBEC3C	-0.132641	0.243894123444931	0.409134560449732	79	79
APOBEC3D	-0.405937	0.000205877632154483	0.00204188379788088	79	79
APOBEC3F	0.0654937650831514	0.566333950207392	0.71405302554871	79	79
APOBEC3G	-0.308606	0.00565547027256519	0.0268871177658335	79	79
APOBEC3H	-0.207393	0.066659694069865	0.16481698840593	79	71
APOBEC4	-0.00268858	0.981238840547692	0.990571514037729	79	13
APOB	-0.00810351	0.943494281241656	0.970646279015566	79	47
APOC1P1	-0.126184	0.267816124200087	0.436344385580171	79	37
APOC1	-0.106514	0.350153441285538	0.523093430747899	79	79
APOC2	0.0638068444895138	0.576395260898046	0.722034091959856	79	78
APOC3	-0.214645	0.0574850689161989	0.148353513856323	79	6
APOC4	0.115489246970336	0.310809160816142	0.482815194392305	79	59
APOD	0.241386433021919	0.0321057163506154	0.0981698899953996	79	79
APOE	0.0446296154162133	0.696130867286628	0.81215758977322	79	79
APOF	0.249341004007286	0.02669195812888	0.0856800780435751	79	24
APOH	-0.1367	0.229635982684991	0.391947745576536	79	25
APOL1	-0.314819	0.00471625742935207	0.0233818043280362	79	79
APOL2	-0.0589809	0.605625514361951	0.744567888103752	79	79
APOL3	-0.520754	8.66382555473064e-07	2.75136923199492e-05	79	79
APOL4	-0.49901	2.85623553355799e-06	7.0368911107021e-05	79	77
APOL5	-0.198876	0.0789050868048856	0.185277037025568	79	27
APOL6	-0.43573	5.97936124023844e-05	0.000770425359002075	79	79
APOLD1	-0.478272	8.27639042990575e-06	0.000162833561459183	79	79
APOM	-0.0987908	0.386381898537867	0.558651831757928	79	79
APOOL	-0.332971	0.00271400199275264	0.0153117848715975	79	79
APOO	-0.433094	6.70190893037294e-05	0.000842089614458099	79	79
APPBP2	0.0169715590754381	0.88198542983464	0.932738606224295	79	79
APPL1	-0.183899	0.104729114202383	0.225904647409557	79	79
APPL2	-0.373349	0.00070165591460114	0.0053526293627139	79	79
APP	0.0700115801287642	0.539802961545402	0.693564268578954	79	79
APRT	0.146939669582861	0.196274636244611	0.351704944405706	79	79
APTX	0.0130888483645024	0.908851910268286	0.949143903266303	79	79
AQP10	-0.0464105	0.684632825495674	0.803787946645197	79	34
AQP11	-0.0582447	0.610141153241871	0.747837626192902	79	79
AQP12B	0.0221628835093484	0.84627613361334	0.909680992890284	79	5
AQP1	-0.423673	0.000100001339166871	0.00115395340064874	79	79
AQP2	0.326897707469967	0.00327724312642959	0.017655120352409	79	56
AQP3	-0.248174	0.0274338901818159	0.0873656242575861	79	78
AQP4	-0.0933295	0.41330224246511	0.585844720703257	79	48
AQP5	0.0491754463500554	0.666923067762636	0.790901321362922	79	48
AQP6	0.287741891988051	0.0101297100476002	0.0419684216625081	79	62
AQP7P1	0.275078623659846	0.014146807765044	0.053978196128445	79	67
AQP7P3	-0.186575	0.0996862161334165	0.218145383029941	79	32
AQP7	-0.217285	0.0544128695338428	0.142671488175776	79	77
AQP8	-0.0895286	0.432663620458834	0.60290470636745	79	76
AQP9	-0.0966008	0.397048662471826	0.568714362216951	79	72
AQPEP	0.116671623633557	0.305847919778667	0.477756139933722	79	79
AQR	-0.154669	0.17350546611712	0.322312526626173	79	79
ARAF	-0.152906	0.178520896987535	0.329131949260145	79	79
ARAP1	-0.136975	0.22869117316736	0.390675762327862	79	79
ARAP2	-0.381175	0.000528689170764057	0.00430644635471464	79	79
ARAP3	-0.656967	4.86171757220303e-11	2.35064044616016e-08	79	79
ARCN1	-0.17581	0.121184159305385	0.250582876185838	79	79
ARC	-0.0434323	0.70389992706596	0.817666641341347	79	79
AREG	-0.126174	0.267853182296163	0.436344385580171	79	70
ARF1	-0.0848852	0.457001166498051	0.624269145364621	79	79
ARF3	-0.105425	0.355129965551539	0.528161606718453	79	79
ARF4	0.243599275720963	0.0305143328005145	0.0943480729595445	79	79
ARF5	-0.120165	0.291491357501781	0.463110396293801	79	79
ARF6	0.209124279242331	0.0643685232533121	0.160796595158752	79	79
ARFGAP1	-0.0476329	0.67678135567334	0.798009475595805	79	79
ARFGAP2	0.163524794644552	0.149871287260446	0.291307607599701	79	79
ARFGAP3	0.334999067840622	0.00254625170255501	0.0145677545520237	79	79
ARFGEF1	-0.224985	0.0462093350947931	0.127542249284044	79	79
ARFGEF2	-0.194151	0.0864371186733371	0.197110467532406	79	79
ARFIP1	-0.28983	0.00957330004642919	0.0402319910686529	79	79
ARFIP2	0.246235181205624	0.0287058853757195	0.0902278275908361	79	79
ARFRP1	-0.337662	0.00234009616968739	0.0135785958361099	79	79
ARG1	0.158366473501653	0.163326578049837	0.308862424903084	79	46
ARG2	-0.0930202	0.414858633228243	0.587351211758585	79	79
ARGFXP2	0.121693284585322	0.285353695616137	0.456018878963484	79	41
ARGFX	0.0923176072594073	0.418406909965646	0.590397609713672	79	13
ARGLU1	-0.0487402	0.669699131086602	0.792917690883329	79	79
ARHGAP10	-0.630382	4.80118250290652e-10	1.20590739748327e-07	79	79
ARHGAP11A	0.0912355832151289	0.423905537730445	0.595180668643107	79	79
ARHGAP11B	0.00317033525654251	0.977877915551809	0.988388482972433	79	77
ARHGAP12	0.322340197795753	0.00376616128640194	0.0197178016456452	79	79
ARHGAP15	-0.477543	8.58093699287266e-06	0.000167406820019585	79	79
ARHGAP17	-0.554884	1.11706384677924e-07	6.10282903861878e-06	79	79
ARHGAP18	0.0893227899377524	0.433726655497496	0.603885507088467	79	79
ARHGAP19	-0.0603745	0.597118056484266	0.738480926922161	79	79
ARHGAP1	0.0770570556138657	0.499684666783094	0.661559853533076	79	79
ARHGAP20	0.100222895146686	0.379500268547646	0.551522154262319	79	79
ARHGAP21	-0.410777	0.000169722938861309	0.00175014442618002	79	79
ARHGAP22	-0.34253	0.00200161848663493	0.0120708766858495	79	79
ARHGAP23	-0.105465	0.354949024863742	0.528054933912675	79	79
ARHGAP24	-0.569634	4.28445135888468e-08	2.86717263947507e-06	79	79
ARHGAP25	-0.473408	1.05174380284275e-05	0.000196528745381437	79	79
ARHGAP26	-0.52892	5.41589654765295e-07	1.94329200800757e-05	79	79
ARHGAP27	-0.251754	0.0252108963596108	0.0824263147142894	79	79
ARHGAP28	-0.24054	0.0327323001999004	0.0996800067073677	79	79
ARHGAP29	-0.506126	1.95065536751978e-06	5.21072856461776e-05	79	79
ARHGAP30	-0.591489	9.47211738113849e-09	1.0408565349501e-06	79	79
ARHGAP31	-0.611274	2.18549823024944e-09	3.74048989141807e-07	79	79
ARHGAP32	0.361393689889441	0.00106682237063109	0.00739179820374508	79	79
ARHGAP33	0.16917875276136	0.136094736374197	0.272069048305355	79	79
ARHGAP36	-0.189579	0.0942554586678232	0.209649289319805	79	60
ARHGAP39	-0.0411156	0.719018662815583	0.827579654755304	79	79
ARHGAP42	-0.370945	0.000764331572451328	0.00573619426123736	79	79
ARHGAP4	-0.136064	0.231829490608354	0.394646804714863	79	79
ARHGAP5	-0.0247817	0.828374051056897	0.899436006481045	79	79
ARHGAP6	-0.493509	3.81345816209491e-06	8.86738868468448e-05	79	79
ARHGAP8	0.271135791878913	0.015650885294974	0.0583551420097932	79	73
ARHGAP9	-0.524396	7.0366668083673e-07	2.31838391948592e-05	79	79
ARHGDIA	0.247583106655216	0.027816616652642	0.0881854233431823	79	79
ARHGDIB	-0.590615	1.0082607611705e-08	1.06092708241367e-06	79	79
ARHGDIG	0.40334840447703	0.000227999315731958	0.00221471962142444	79	56
ARHGEF10L	-0.180647	0.111121715617397	0.235874065137158	79	79
ARHGEF10	-0.147074	0.195861074985798	0.35119165494394	79	79
ARHGEF11	0.132848584109199	0.243151809542812	0.40806629612617	79	79
ARHGEF12	-0.293107	0.00875396178256766	0.0374643993969592	79	79
ARHGEF15	-0.519735	9.1791731824966e-07	2.86330982821749e-05	79	79
ARHGEF16	0.116867112085953	0.305032639153743	0.476829230620223	79	77
ARHGEF17	-0.487102	5.306132710997e-06	0.000114210653068257	79	79
ARHGEF18	0.18448103790741	0.103616002958293	0.224253972382876	79	79
ARHGEF19	0.0528654252001834	0.643570476901062	0.772892015851126	79	79
ARHGEF1	-0.0553394	0.628102607995914	0.760983829573837	79	79
ARHGEF2	-0.152272	0.180351276785882	0.331243465625733	79	79
ARHGEF33	0.136688025546087	0.229676577674053	0.391947852485325	79	79
ARHGEF35	-0.555652	1.0639146561243e-07	5.86213944428604e-06	79	73
ARHGEF37	-0.258378	0.0214993238375874	0.0734104736968468	79	79
ARHGEF3	-0.00232513	0.983774653880481	0.992047743280684	79	79
ARHGEF4	0.515487016164205	1.16549875519992e-06	3.45875839259004e-05	79	77
ARHGEF5	-0.498716	2.90105607755013e-06	7.12010463703294e-05	79	73
ARHGEF6	0.323011749311559	0.00369026284781345	0.0194150390306616	79	79
ARHGEF7	0.136267757885105	0.231125661338542	0.393725912999859	79	79
ARHGEF9	0.124532970014267	0.274177030902318	0.443434000472556	79	79
ARID1A	-0.0492304	0.666572755569015	0.790680631088753	79	79
ARID1B	0.00268499145635759	0.981263900254713	0.990571514037729	79	79
ARID2	-0.188991	0.0953000623619469	0.211219711904659	79	79
ARID3A	-0.116267	0.30754025246795	0.479650893766605	79	79
ARID3B	0.205381148202882	0.0694040100274501	0.169693243227672	79	79
ARID3C	0.0635754105884988	0.577782025260089	0.723077857748148	79	39
ARID4A	-0.0324235	0.776665453205414	0.867496960149737	79	79
ARID4B	0.195927414337421	0.0835411908997214	0.192458205122169	79	79
ARID5A	-0.371446	0.000750870255744041	0.00565945866089192	79	79
ARID5B	-0.0448539	0.69467922317724	0.811004236161283	79	79
ARIH1	-0.140131	0.218042494671778	0.377527435156484	79	79
ARIH2	0.19671367157809	0.0822844874743235	0.190561847413893	79	79
ARL10	-0.0429028	0.707345729932384	0.819616211799712	79	74
ARL11	-0.603942	3.8076233596732e-09	5.67154958548769e-07	79	79
ARL13A	-0.0271433	0.812305181375789	0.889680723060809	79	23
ARL13B	-0.371104	0.000760036277221368	0.00571727016781846	79	79
ARL14	-0.267924	0.0169763061732547	0.0618075605027758	79	58
ARL15	-0.25866	0.0213523443214932	0.0730892635712704	79	79
ARL16	0.136544667076884	0.230170164165982	0.392513091876387	79	79
ARL17A	0.105185063631101	0.356233285952017	0.528969562295269	79	79
ARL17B	0.0840768307103456	0.461313448591684	0.628251679160846	79	58
ARL1	-0.063531	0.578048373334673	0.723156641446698	79	79
ARL2BP	-0.145851	0.199647193222961	0.355957228116927	79	79
ARL2	-0.345364	0.00182547995368125	0.0112280780382475	79	79
ARL3	0.338138128145402	0.00230485933804689	0.0134099251499758	79	79
ARL4A	0.211307707372865	0.0615705004302627	0.155677013769288	79	79
ARL4C	-0.174051	0.125011752466818	0.256261254859187	79	79
ARL4D	-0.152477	0.179756531901538	0.330590654904502	79	79
ARL5A	-0.0733116	0.52081713005682	0.678746852782945	79	79
ARL5B	0.193688885148871	0.0872026945334614	0.198411777914958	79	79
ARL5C	-0.270918	0.0157379099346434	0.0586127368352327	79	16
ARL6IP1	-0.166432	0.142663485378657	0.281369753948932	79	79
ARL6IP4	-0.168962	0.13660455891795	0.272757812252029	79	79
ARL6IP5	-0.348035	0.00167239191655171	0.0104538007970621	79	79
ARL6IP6	0.22211818560648	0.0491355898371224	0.132906616426566	79	79
ARL6	0.0623239551772089	0.585307345454669	0.728714050540318	79	79
ARL8A	0.385479863695361	0.000451101111009878	0.00379317195083958	79	79
ARL8B	-0.223218	0.0479957318396354	0.130916308081492	79	79
ARL9	-0.131009	0.249796236969697	0.415932778561682	79	74
ARMC10	-0.093656	0.411662854121799	0.583948921718908	79	79
ARMC1	-0.229924	0.041506618687493	0.118285762544153	79	79
ARMC2	-0.439043	5.17355711334979e-05	0.00069099858129962	79	79
ARMC3	-0.0682883	0.549850398190972	0.70073593790237	79	20
ARMC4	-0.0917467	0.421303056572353	0.592624999207892	79	65
ARMC5	0.0607829151992224	0.59463483607292	0.736533734446668	79	79
ARMC6	0.29186232663607	0.00905768750689457	0.0385475382061773	79	79
ARMC7	-0.057302	0.615944897551994	0.752091313760689	79	79
ARMC8	0.149271236873043	0.189191691560959	0.342792515906777	79	79
ARMC9	-0.418576	0.000123569683272463	0.00136718402430746	79	79
ARMCX1	-0.146362	0.198057656648279	0.353981617186739	79	79
ARMCX2	-0.118252	0.299298737100264	0.470796061449296	79	79
ARMCX3	-0.278255	0.013027570486989	0.0505037517990461	79	79
ARMCX5	-0.345278	0.00183062492706793	0.0112465965976791	79	79
ARMCX6	-0.12737	0.263308969898394	0.431705279572307	79	79
ARMS2	-0.265223	0.0181642673689593	0.0649446491931543	79	55
ARNT2	0.178182538013988	0.116164398392817	0.243377690923745	79	79
ARNTL2	-0.414999	0.000143070601132166	0.00153295591462387	79	73
ARNTL	0.271764691535105	0.015402110385188	0.0576164051933338	79	79
ARNT	-0.0981282	0.389590687702388	0.561912439418613	79	79
ARPC1A	-0.0650563	0.568935410536751	0.715712832877997	79	79
ARPC1B	-0.0871003	0.445298343551852	0.61387625378094	79	79
ARPC2	0.214056694619594	0.0581889584160201	0.14967401126987	79	79
ARPC3	-0.227093	0.0441508686277232	0.123374916812623	79	79
ARPC4	0.00917909562435907	0.936009118301187	0.966003366645763	79	79
ARPC5L	0.307072104595194	0.00591141456581391	0.0278302720795621	79	79
ARPC5	-0.00444227	0.969006330177747	0.983670863250806	79	79
ARPM1	0.168471714461349	0.13776310298738	0.274475987614704	79	78
ARPP19	0.0749746699907672	0.511378388671624	0.670876274379949	79	79
ARPP21	-0.122347	0.282755435820591	0.45300255361745	79	28
ARR3	0.0428608065817845	0.707619203003215	0.819760963972405	79	7
ARRB1	-0.480401	7.44355425098517e-06	0.000149800561096829	79	79
ARRB2	-0.435056	6.1569929856056e-05	0.000788062503915369	79	79
ARRDC1	-0.0429728	0.706889981247049	0.819521174758298	79	79
ARRDC2	-0.130543	0.25149934383728	0.417761514198488	79	79
ARRDC3	-0.130463	0.251794766063212	0.418180401516748	79	79
ARRDC4	0.141304417005496	0.21417534472582	0.373166771801564	79	79
ARRDC5	-0.374523	0.000672791784070682	0.00517779271942976	79	50
ARSA	-0.129695	0.254618560045855	0.42127837721677	79	79
ARSB	-0.439591	5.05038856640478e-05	0.00067892198043043	79	79
ARSD	-0.322973	0.00369464477748631	0.0194328066349158	79	79
ARSE	-0.220234	0.0511407738185105	0.136629723117833	79	52
ARSF	0.123561860624236	0.277965727860679	0.447764215960813	79	41
ARSG	-0.388252	0.000406805594719339	0.00349206400438172	79	79
ARSI	-0.324433	0.00353414757726703	0.0187791934297779	79	69
ARSJ	0.0395583229652197	0.729242512966048	0.835274894731011	79	78
ARSK	-0.295562	0.00818116508613812	0.0355558950035756	79	79
ART1	0.0235044570786657	0.83709504487711	0.90414115302445	79	7
ART3	-0.0808216	0.478903238653289	0.642736516096443	79	56
ART4	-0.122576	0.281849207222302	0.452184137491537	79	68
ART5	-0.160163	0.158542699184247	0.302550487092693	79	45
ARTN	0.345209360681145	0.00183470735898898	0.0112680979113518	79	77
ARV1	0.0976115879754488	0.392103830303786	0.5640229139513	79	79
ARVCF	0.0394725527348605	0.729807010364181	0.835521670540654	79	79
ARX	-0.00107955	0.992466229800496	0.996278256220367	79	69
AR	-0.213017	0.059450059439719	0.151965179492273	79	65
AS3MT	-0.0165272	0.885053937540525	0.934682278696472	79	79
ASAH1	-0.578545	2.34654829404589e-08	1.91486261632268e-06	79	79
ASAH2B	0.0173385309564823	0.879452551028274	0.931090741509723	79	69
ASAH2	0.144432050008262	0.204102805161262	0.361472603193446	79	76
ASAM	0.0587836566195176	0.606833973134476	0.745373292180063	79	72
ASAP1IT1	0.0874231199204146	0.443606766403599	0.612548540785778	79	7
ASAP1	0.0739497581698606	0.517184827543223	0.675615315086346	79	79
ASAP2	-0.199418	0.0780768294980971	0.183922762788453	79	79
ASAP3	-0.146003	0.199174279793728	0.355484172315176	79	79
ASB10	0.00327618253795233	0.977139525381698	0.988021039414547	79	5
ASB11	-0.243111	0.0308596277130645	0.0952096913439545	79	9
ASB12	-0.0151359	0.894672338055649	0.940225127315995	79	78
ASB13	0.28927321589801	0.00971902455613997	0.0406588654371073	79	79
ASB14	0.0155233274765883	0.891992591037233	0.938786281598829	79	79
ASB15	-0.239728	0.0333439843986008	0.100982251529743	79	11
ASB16	-0.1265	0.266610872474769	0.434932247017926	79	78
ASB17	0.344321573408923	0.00188856158672952	0.0115183794031375	79	17
ASB18	0.0686858399783543	0.547524783467225	0.699158881754033	79	4
ASB1	0.16545635672126	0.14505220473785	0.284629630644279	79	79
ASB2	-0.352201	0.00145661569725321	0.00940913412988544	79	77
ASB3	0.227102683931159	0.0441419108779814	0.123367710459561	79	79
ASB4	0.487710100637923	5.14390536742048e-06	0.000111528172428153	79	73
ASB5	-0.0828393	0.46795833494128	0.633690212817168	79	16
ASB6	0.597606333005336	6.08310090046199e-09	7.63942671525551e-07	79	79
ASB7	0.0246703152852323	0.829134048186993	0.899818674954675	79	79
ASB8	-0.302972	0.00664653419116678	0.0304390175839843	79	79
ASB9	-0.414623	0.000145279687043596	0.00155146833099014	79	79
ASCC1	0.334600546365104	0.0025784659473606	0.0147188699592544	79	79
ASCC2	0.0807352540120896	0.479374683753414	0.643045821557244	79	79
ASCC3	-0.134883	0.235944974917991	0.399507600675358	79	79
ASCL1	0.0594664671511974	0.602655254758521	0.742662968461183	79	59
ASCL2	-0.0857642	0.452337026467063	0.6204395809839	79	77
ASCL3	-0.0543363	0.634355683088706	0.76552176889049	79	4
ASCL4	-0.155884	0.170110827132781	0.317838218215436	79	20
ASF1A	0.228073122219731	0.0432202739331654	0.12164612954447	79	79
ASF1B	0.217057437942554	0.0546720296716895	0.143253902431984	79	79
ASFMR1	-0.188386	0.0963829659240833	0.212839296754027	79	49
ASGR1	0.593043264671363	8.47135230686144e-09	9.55142618819242e-07	79	79
ASGR2	-0.556776	9.90424867646596e-08	5.54153453860306e-06	79	69
ASH1L	0.0501537361495956	0.660699755976045	0.786431147253613	79	79
ASH2L	-0.0517495	0.650597653412788	0.778479157149249	79	79
ASIP	-0.255483	0.0230597437413049	0.0772596322576329	79	69
ASL	-0.118104	0.299906321608788	0.471346042476371	79	79
ASMTL	-0.139639	0.219678342345838	0.379574657461673	79	79
ASMT	0.122093436224007	0.283760729667314	0.454111089099368	79	72
ASNA1	0.0906511774827401	0.426892519973547	0.597575371763781	79	79
ASNSD1	-0.0444106	0.697549721265707	0.813226331260399	79	79
ASNS	0.019507449242016	0.864507966340746	0.921460323503129	79	79
ASPA	-0.108596	0.340764876930264	0.513991009189776	79	78
ASPDH	0.0330592841477707	0.772403180274326	0.864233584408762	79	31
ASPG	-0.0689338	0.546076511839306	0.698071236629795	79	66
ASPHD1	0.21629359808916	0.0555503389913603	0.144595364211697	79	79
ASPHD2	0.273706376973498	0.0146554444025217	0.0554995681896945	79	79
ASPH	-0.306916	0.00593795950416186	0.0279212586458766	79	79
ASPM	0.310132116355796	0.00541059664968976	0.0259783860985601	79	79
ASPN	-0.315096	0.00467773843364769	0.0232325273001403	79	79
ASPRV1	0.182855410735104	0.106748769414353	0.228882616460487	79	79
ASPSCR1	0.245132084722093	0.0294513786882488	0.091884029706686	79	79
ASRGL1	-0.047099	0.68020678696181	0.800567748525609	79	79
ASS1	0.157633310839777	0.165309252379926	0.311515243206447	79	79
ASTE1	-0.351898	0.00147140587903401	0.00947618704645944	79	79
ASTL	0.0149626720035998	0.895871294492332	0.940820527556565	79	56
ASTN1	0.424391172270338	9.70354538454219e-05	0.00112582445563711	79	79
ASTN2	0.280072607858748	0.0124224703422604	0.0487521461889845	79	79
ASXL1	0.159503798880569	0.160285797978813	0.304870902135154	79	79
ASXL2	-0.142263	0.211052292652008	0.369205964621235	79	79
ASXL3	-0.214758	0.0573509236140631	0.1481654906086	79	29
ASZ1	0.128854147246914	0.257738983864641	0.424867470666231	79	7
ATAD1	0.275777016289063	0.0138938567501168	0.053270077773831	79	79
ATAD2B	0.180500358843039	0.111417134970352	0.236376414033194	79	79
ATAD2	0.142498006906183	0.210290712738194	0.368389708727959	79	79
ATAD3A	0.0802621501470446	0.481962027357656	0.645374618091606	79	79
ATAD3B	0.255368504240514	0.023123489947923	0.0773984589118779	79	79
ATAD3C	-0.26206	0.0196456993317198	0.0687688371177306	79	78
ATAD5	0.0342356241229989	0.764535298239128	0.858808890511978	79	79
ATCAY	0.0901668707185808	0.429376968913614	0.599897505457524	79	61
ATE1	-0.0756415	0.507618828702167	0.667799682568558	79	79
ATF1	0.0354414303755529	0.756494995569875	0.853691414449641	79	79
ATF2	-0.0198607	0.862078114758047	0.919931819616888	79	79
ATF3	-0.104638	0.358754903729289	0.531224243023081	79	79
ATF4	0.327105373332433	0.00325638154734978	0.0175525136916792	79	79
ATF5	0.420985449580667	0.000111852925655954	0.0012635721858564	79	79
ATF6B	-0.263222	0.0190898263399004	0.0673348972120507	79	79
ATF6	0.00740146963218318	0.948382607476327	0.973090663001305	79	79
ATF7IP2	-0.0686375	0.547807095883138	0.699220514412611	79	79
ATF7IP	-0.213807	0.0584901899553868	0.150146041111917	79	79
ATF7	-0.0726641	0.524515489619077	0.681563556349125	79	79
ATG10	-0.253846	0.0239839711442686	0.0794944304935999	79	79
ATG12	-0.0508227	0.656457456532872	0.783020057317487	79	79
ATG16L1	0.00525171873062898	0.96336238721658	0.980715671049051	79	79
ATG16L2	-0.183667	0.105176363327454	0.226514333953998	79	79
ATG2A	-0.151065	0.183869849760709	0.335778779703487	79	79
ATG2B	0.0651092712372706	0.568619905815428	0.715678054045971	79	79
ATG3	-0.0410531	0.719427849603335	0.827853549790475	79	79
ATG4A	-0.170612	0.132759305506951	0.267454684219211	79	79
ATG4B	0.297735016414632	0.00770173791622919	0.0339617627186839	79	79
ATG4C	-0.427053	8.6744395947356e-05	0.00103557815902584	79	79
ATG4D	0.374474516847614	0.000673962065610159	0.00518061460608127	79	79
ATG5	-0.300239	0.00718009222698166	0.0322862087118869	79	79
ATG7	-0.344054	0.00190508196424791	0.0116008454623912	79	79
ATG9A	0.370356872193678	0.000780407534265732	0.00582969552441068	79	79
ATG9B	0.0372940976535225	0.744191904913332	0.845589188235882	79	79
ATHL1	0.0549362853009298	0.630612510837714	0.762872706549158	79	79
ATIC	0.219513581732823	0.051924461059745	0.138002057554832	79	79
ATL1	0.168504814540843	0.137684654941547	0.274404495730578	79	79
ATL2	0.486752122982224	5.4017874140373e-06	0.000115821029476143	79	79
ATL3	-0.148704	0.19089656664257	0.344924191221239	79	79
ATMIN	-0.334963	0.00254914380587734	0.014577303727282	79	79
ATM	-0.24917	0.0267998883788906	0.0859837161990286	79	79
ATN1	0.0263012109874978	0.818026542367298	0.89331639352815	79	79
ATOH1	0.00181463989555891	0.987336667929239	0.994200566491759	79	8
ATOH7	0.194881615475261	0.0852362881685978	0.195328165559929	79	71
ATOH8	-0.145547	0.20059443407265	0.357096498063793	79	79
ATOX1	-0.346409	0.00176413553321209	0.0109287243797442	79	79
ATP10A	0.224174483120525	0.0470219069326387	0.128993429798189	79	79
ATP10B	-0.141677	0.212957426284662	0.37156987996462	79	43
ATP10D	0.343354513488133	0.00194884053206619	0.0118101128403215	79	79
ATP11A	-0.248587	0.0271694631165861	0.086766416227671	79	79
ATP11B	-0.200432	0.076544008484631	0.181505777843644	79	79
ATP11C	-0.205163	0.0697068756948357	0.170154105255348	79	79
ATP12A	0.150269185263978	0.186217213378977	0.339054877306478	79	5
ATP13A1	0.503929018554135	2.19637453898299e-06	5.71181404443873e-05	79	79
ATP13A2	-0.00440976	0.969233040392664	0.983832834786864	79	79
ATP13A3	-0.0551557	0.629246104211475	0.761991753168229	79	79
ATP13A4	-0.0325903	0.775546250685826	0.8666973586192	79	72
ATP13A5	-0.111943	0.325999871189846	0.498698044695135	79	39
ATP1A1	-0.188948	0.0953758174002556	0.211339173753545	79	79
ATP1A2	-0.124178	0.275556612068676	0.444958243083259	79	78
ATP1A3	0.319137672039569	0.00414757495077837	0.021194979633568	79	78
ATP1A4	-0.268545	0.0167127489673134	0.0610664207496394	79	24
ATP1B1	-0.0838171	0.462704021592954	0.629206841429561	79	79
ATP1B2	0.223163459822284	0.0480515796210645	0.130947257424795	79	79
ATP1B3	-0.0612908	0.591553263051018	0.73384477917939	79	79
ATP2A1	0.327942135333514	0.00317351915309665	0.0172355971541382	79	79
ATP2A2	-0.304533	0.00635769215496735	0.0293525343225277	79	79
ATP2A3	0.014781741820875	0.897123523638559	0.941470993931832	79	79
ATP2B1	-0.301213	0.00698578277519816	0.0316553511884565	79	79
ATP2B2	0.255039746333282	0.0233070753015705	0.0778916254246368	79	78
ATP2B3	0.126479655311573	0.266686802353921	0.434993907187722	79	79
ATP2B4	0.172655933470256	0.128111564196442	0.26073210195735	79	79
ATP2C1	-0.0400308	0.726135209144184	0.832994539702742	79	79
ATP2C2	0.103104890033904	0.365877516730598	0.538431834847798	79	79
ATP4A	0.471848986592642	1.13484152749043e-05	0.000208698765918122	79	75
ATP4B	-0.0481726	0.673325845102175	0.795204804115893	79	25
ATP5A1	-0.115494	0.310789988887648	0.482815194392305	79	79
ATP5B	-0.150321	0.18606429288138	0.338808344254392	79	79
ATP5C1	0.0788599797168153	0.489673850689379	0.652538570408088	79	79
ATP5D	0.126832375942651	0.2653445581053	0.433647909579462	79	79
ATP5EP2	-0.074233	0.515576806835504	0.674325789152543	79	79
ATP5E	-0.0928303	0.415815855188099	0.588129752112069	79	79
ATP5F1	-0.178383	0.11574725110336	0.242793040817678	79	79
ATP5G1	-0.0664233	0.560825345590857	0.709314366838617	79	79
ATP5G2	-0.0135595	0.905589269501229	0.947271159724905	79	79
ATP5G3	-0.0759367	0.50595877682692	0.66638516555611	79	79
ATP5H	0.0789143912527081	0.489373382421662	0.652336519865861	79	79
ATP5I	-0.0563363	0.621914439910001	0.756609754536039	79	79
ATP5J2	0.00721424180600544	0.949686602664556	0.973631522406221	79	79
ATP5J	0.184375122127418	0.103817907968443	0.224489975414768	79	79
ATP5L2	0.116907079386895	0.304866130565191	0.476645995564333	79	58
ATP5L	0.0269503931597148	0.813614987902573	0.890519351001096	79	79
ATP5O	-0.13589	0.232435325626417	0.395295391981613	79	79
ATP5SL	0.035837502713508	0.753859571441895	0.851515250069282	79	79
ATP5S	-0.0539333	0.636874829424546	0.767519890395733	79	79
ATP6AP1L	0.035273172965683	0.757615405708049	0.854211038675081	79	79
ATP6AP1	0.042300356879171	0.711273102238173	0.822531798450506	79	79
ATP6AP2	-0.372928	0.000712281220957551	0.00541490519391472	79	79
ATP6V0A1	0.00992679300677558	0.930808988173663	0.962768522370234	79	79
ATP6V0A2	-0.0848313	0.457287546361631	0.624459260989534	79	79
ATP6V0A4	-0.0292925	0.797748264638533	0.880418365562043	79	55
ATP6V0B	0.297349675915383	0.00778490179945034	0.0342104069078322	79	79
ATP6V0C	-0.134468	0.237402228907127	0.401202298764754	79	79
ATP6V0D1	-0.176297	0.120140594645009	0.249325141544166	79	79
ATP6V0D2	0.0877632539117489	0.441828536928746	0.61096553011597	79	47
ATP6V0E1	-0.251625	0.0252882575060253	0.0826140034065082	79	79
ATP6V0E2	-0.138558	0.22330719093797	0.383889873132475	79	79
ATP6V1A	-0.147981	0.193088353326492	0.347832409960353	79	79
ATP6V1B1	0.363565640161215	0.000989802642903982	0.00696354423927356	79	79
ATP6V1B2	-0.646091	1.27477705956696e-10	5.03146700653571e-08	79	79
ATP6V1C1	-0.348683	0.0016370256160239	0.0102963149300859	79	79
ATP6V1C2	0.131537053654072	0.247877234160412	0.413776043932895	79	79
ATP6V1D	0.167400986876485	0.140319014882397	0.277993213258099	79	79
ATP6V1E1	0.117290344493014	0.303272405122737	0.474957853550692	79	79
ATP6V1E2	-0.0751258	0.510524898447227	0.670211209338132	79	79
ATP6V1F	-0.105339	0.355524588363238	0.528464033429024	79	79
ATP6V1G1	0.324213438690702	0.00355784416268402	0.0188723823659652	79	79
ATP6V1G2	0.176967595384506	0.118714260266211	0.247166949461571	79	79
ATP6V1G3	-0.0824865	0.469862316245338	0.635265578287167	79	4
ATP6V1H	-0.117478	0.30249472136552	0.474011336186125	79	79
ATP7A	-0.244284	0.03003558055033	0.0931507581532044	79	79
ATP7B	-0.076694	0.501713181633602	0.663190002924876	79	79
ATP8A1	-0.24627	0.0286824783333185	0.0901966355281498	79	79
ATP8A2	0.0274211059220729	0.810419845554872	0.888424599396846	79	74
ATP8B1	-0.0316312	0.781985940761331	0.870832786374676	79	79
ATP8B2	0.047310955310643	0.67884600820094	0.799663893202959	79	79
ATP8B3	0.577074998762895	2.59480514358671e-08	2.04369967095826e-06	79	79
ATP8B4	-0.477896	8.43195059218483e-06	0.000165389375712834	79	79
ATP8B5P	0.202518505294696	0.073465158521849	0.176258053071897	79	79
ATP9A	0.125414284137201	0.270768737560916	0.439908214417684	79	79
ATP9B	0.187925673203885	0.0972148260127133	0.214269328542159	79	79
ATPAF1	-0.0944671	0.407606458366197	0.579512527001563	79	79
ATPAF2	-0.0192155	0.866517261970319	0.922567786760581	79	79
ATPBD4	-0.0907246	0.4265163985136	0.597308265550545	79	79
ATPIF1	0.109000652101814	0.338956145922826	0.512301645994644	79	79
ATRIP	0.000237914488506164	0.998339663941297	0.998907812128133	79	79
ATRNL1	0.362237745190586	0.00103626794143829	0.0072195324162163	79	79
ATRN	0.0234991454093867	0.837131353402582	0.90414115302445	79	79
ATRX	-0.314049	0.00482451543940826	0.0238329830391202	79	79
ATR	0.248545640643873	0.0271959500530988	0.0868230740984525	79	79
ATXN10	0.28035826201263	0.0123296108820607	0.048479280176834	79	79
ATXN1L	-0.233634	0.0382412061629949	0.111787322731608	79	79
ATXN1	0.0904128453827394	0.42811411362205	0.598678738788897	79	79
ATXN2L	-0.0847611	0.457661750350876	0.624747411874917	79	79
ATXN2	0.161669452232619	0.154611989414486	0.297383975661478	79	79
ATXN3	0.16858503875996	0.137494661550369	0.27408232883778	79	79
ATXN7L1	-0.130431	0.251911054288796	0.418301690559398	79	79
ATXN7L2	0.0698695222890905	0.540627819171436	0.694124004154378	79	79
ATXN7L3B	-0.0550522	0.629890703336471	0.762452258701899	79	79
ATXN7L3	0.133246269983251	0.241731299759041	0.406387633635244	79	79
ATXN7	0.104710413381753	0.35841993460454	0.530850171178726	79	79
AUH	-0.0137274	0.904425653937361	0.946463511019348	79	79
AUP1	0.308290942132293	0.00570722543274747	0.0270812034434543	79	79
AURKAIP1	-0.0185513	0.871090311663173	0.925195597098455	79	79
AURKAPS1	0.185649027327889	0.101409726159969	0.220813342032627	79	78
AURKA	0.193760353091747	0.0870838662480461	0.198244104891574	79	79
AURKB	0.190563792026373	0.0925253468124738	0.206847787233065	79	79
AURKC	-0.00721837	0.949657822057081	0.973631522406221	79	79
AUTS2	0.302398184774121	0.00675551107708668	0.0308358707176909	79	79
AVEN	-0.0250987	0.826213373648888	0.898249853638175	79	79
AVIL	-0.160483	0.1577026708623	0.301320851064698	79	79
AVL9	-0.202614	0.0733269729781727	0.176079421082426	79	79
AVPI1	0.22289822826225	0.0483247574590139	0.131421487366095	79	79
AVPR1A	-0.315568	0.00461283569141456	0.0230084085495573	79	74
AVPR1B	-0.102791	0.367345809911146	0.540181566581627	79	7
AVPR2	-0.403501	0.000226633408650294	0.00220255785090285	79	71
AVP	-0.0849232	0.456798661499899	0.624124769580222	79	19
AWAT1	-0.141056	0.214990535685447	0.374212849126364	79	4
AWAT2	-0.147216	0.19542516619258	0.350605075525464	79	23
AXIN1	0.0164424654611154	0.885639367213726	0.93500001975618	79	79
AXIN2	0.534422635543428	3.91871902271597e-07	1.55303331760916e-05	79	79
AXL	-0.393218	0.000337283149975149	0.00300405787886019	79	79
AZGP1	-0.242513	0.0312870160313013	0.0963060464818347	79	60
AZI1	0.339563892101787	0.00220216794545417	0.0129570818573421	79	79
AZI2	-0.174529	0.123961796650275	0.254638464919418	79	79
AZIN1	-0.188751	0.0957279613961157	0.211804001075492	79	79
AZU1	0.283645229841996	0.0113037095788984	0.0456300862567093	79	35
B2M	-0.528863	5.43404061914629e-07	1.94619158470906e-05	79	79
B3GALNT1	-0.234691	0.0373513360364623	0.109816789137303	79	79
B3GALNT2	0.459619207825347	2.03461630170079e-05	0.0003331878008035	79	79
B3GALT1	0.263361654148269	0.0190239667111761	0.0671515817109229	79	46
B3GALT2	-0.397179	0.000289830246993113	0.00268196984538124	79	72
B3GALT4	-0.115433	0.311045924864647	0.483027797244441	79	79
B3GALT5	-0.0120247	0.916234263558281	0.953866106325949	79	26
B3GALT6	0.201562193738896	0.0748635433515846	0.178562475398966	79	79
B3GALTL	-0.223097	0.0481202752352939	0.131050367113227	79	79
B3GAT1	0.0563926449161993	0.62156559327462	0.756328084430046	79	64
B3GAT2	-0.0770031	0.499985621139268	0.661720516857144	79	76
B3GAT3	0.116377168779861	0.307078608789757	0.479330128651647	79	79
B3GNT1	-0.0921786	0.419110858761092	0.590830527621512	79	79
B3GNT2	-0.287017	0.0103293580082786	0.0425288401383336	79	79
B3GNT3	-0.430089	7.62414775436635e-05	0.000928532856230763	79	55
B3GNT4	0.390747785955977	0.000370371324627467	0.0032397021340096	79	65
B3GNT5	-0.316229	0.00452335738523995	0.0226667116852845	79	79
B3GNT6	-0.0720962	0.527770004003935	0.684257684349139	79	4
B3GNT7	-0.177172	0.118282879230918	0.246587354136677	79	79
B3GNT8	-0.467571	1.3955156118445e-05	0.000245580272366448	79	79
B3GNT9	0.190098603117747	0.0933390689314366	0.208181194226431	79	79
B3GNTL1	-0.297424	0.00776886478202128	0.0341615412020499	79	79
B4GALNT1	0.218420324067284	0.0531331173827583	0.140400941410376	79	79
B4GALNT2	-0.208204	0.0655779250633097	0.162996667616554	79	20
B4GALNT3	0.297212626283511	0.00781466931658534	0.0343100350925676	79	79
B4GALNT4	0.497304471912007	3.12572885450859e-06	7.50718902053999e-05	79	76
B4GALT1	-0.352864	0.00142471083755152	0.00924938153684003	79	79
B4GALT2	0.424204238715297	9.77991421058842e-05	0.0011325960528909	79	79
B4GALT3	0.100127092462882	0.379958301394428	0.552012736551099	79	79
B4GALT4	-0.0588857	0.606208544491236	0.744956226441197	79	79
B4GALT5	0.241297607633691	0.032171024643624	0.098307412957448	79	79
B4GALT6	0.125871572313789	0.269011539473761	0.437840603920728	79	79
B4GALT7	-0.252415	0.0248179996207307	0.0814353771063679	79	79
B9D1	-0.254024	0.0238819838625951	0.0792317157034209	79	79
B9D2	-0.0816486	0.47440068005201	0.638876760128534	79	79
BAALC	-0.231902	0.0397384965753039	0.114585307856524	79	79
BAAT	0.375011817103724	0.000661094450690272	0.00511013855969219	79	70
BACE1	0.372223062382028	0.000730400836515261	0.00553474180767941	79	79
BACE2	0.0973946144346028	0.393162139235207	0.564747160784975	79	79
BACH1	-0.195757	0.0838152024945422	0.192951555320134	79	79
BACH2	0.172292160150807	0.12892963103956	0.261729722295066	79	78
BAD	0.123682755070507	0.277492174103357	0.447208681571165	79	79
BAG1	-0.192742	0.0887895066470592	0.200957230014889	79	79
BAG2	-0.308198	0.00572250214955939	0.0271390857215494	79	79
BAG3	-0.396088	0.000302239805352624	0.00277160637056413	79	79
BAG4	-0.20975	0.0635557852269787	0.159383932350852	79	79
BAG5	0.238986250578917	0.0339100837062069	0.102296212584315	79	79
BAGE2	-0.236091	0.0361985994593041	0.107374373242783	79	49
BAGE	-0.0829927	0.467131879704609	0.633055185585253	79	14
BAHCC1	0.265115971312724	0.018212765853448	0.0650359844175931	79	79
BAHD1	-0.295332	0.00823340165745636	0.0357133601525884	79	79
BAI1	0.413326144611699	0.000153131761824209	0.00162214912782024	79	79
BAI2	0.0595052092239335	0.602418539178697	0.742465877371655	79	79
BAI3	0.207234808888849	0.0668720919540643	0.165173213076833	79	65
BAIAP2L1	0.203356618850356	0.0722569024039013	0.174364336591942	79	79
BAIAP2L2	0.277657300029846	0.0132322007948275	0.0511412396826467	79	78
BAIAP2	-0.110316	0.333126280088618	0.506082065040634	79	79
BAIAP3	0.339875814371112	0.00218025721863583	0.0128617922404638	79	79
BAK1	0.167284815454951	0.140598461319469	0.278432750554835	79	79
BAMBI	0.247736396387029	0.0277169772955983	0.0879774070075284	79	79
BANF1	-0.00158877	0.988912796356878	0.995040177156156	79	79
BANK1	-0.222313	0.0489324189148723	0.132486767718554	79	78
BANP	0.0674407261706436	0.554825422507236	0.704783163959931	79	79
BAP1	0.183125134708469	0.106223949684012	0.228035429780086	79	79
BARD1	-0.153271	0.177474049197494	0.327670464103059	79	79
BARHL1	0.0120968826606955	0.915733486161509	0.953550079274408	79	7
BARHL2	0.119471202116595	0.29430728899925	0.466052810058585	79	15
BARX1	0.441512196278673	4.64001039252263e-05	0.000635346594890567	79	53
BARX2	0.180109257967302	0.112207468963739	0.237610035011357	79	30
BASP1	-0.277936	0.0131364337144865	0.0508524075336609	79	79
BAT1	0.104269313676461	0.360459422601636	0.532825292547171	79	79
BAT2L1	0.260954487750882	0.0201873131622802	0.0702198986616004	79	79
BAT2L2	-0.0791738	0.48794208120368	0.651033141603279	79	79
BAT2	0.115217145207834	0.311958224514096	0.483752777125382	79	79
BAT3	-0.213125	0.0593172210581062	0.151737759357611	79	79
BAT4	-0.0838868	0.462330290990992	0.628956610123432	79	79
BAT5	-0.0803077	0.481712695547499	0.645130083227521	79	79
BATF2	-0.328466	0.00312259577654889	0.0170211393231273	79	79
BATF3	-0.437445	5.54863425192906e-05	0.000726616922477631	79	79
BATF	-0.318083	0.0042804835956798	0.0217225276149166	79	79
BAX	0.0392820847522703	0.731061089821937	0.836462253869506	79	79
BAZ1A	-0.203354	0.072261125014706	0.174364336591942	79	79
BAZ1B	-0.0242968	0.831683013090854	0.901339830457138	79	79
BAZ2A	0.0011140893703041	0.992225209250833	0.996243149564485	79	79
BAZ2B	0.0715199639702908	0.531082825249675	0.686711361926103	79	79
BBC3	0.174578993504824	0.123852508159045	0.254549150669067	79	79
BBOX1	-0.235496	0.0366848511378055	0.108357440595731	79	15
BBS10	0.0861233417398979	0.450438836997749	0.618713572978442	79	79
BBS12	-0.294767	0.00836285972938682	0.0361344296618278	79	79
BBS1	-0.213352	0.0590406252904885	0.151257874303623	79	79
BBS2	0.111180189988874	0.329327880955624	0.502025791572615	79	79
BBS4	-0.187227	0.0984870384073693	0.216373886493073	79	79
BBS5	0.104298747903196	0.360323107293138	0.532767433072104	79	79
BBS7	-0.259337	0.0210025832054177	0.0722243881921725	79	79
BBS9	-0.180717	0.110980763225671	0.235631568864252	79	79
BBX	-0.00404188	0.971798607390199	0.984989521876549	79	79
BCAM	0.229057877514132	0.0423013926061319	0.119904577605539	79	79
BCAN	0.455674047260777	2.44470458203799e-05	0.000381295053359796	79	77
BCAP29	0.213010848825509	0.0594571792547227	0.151965179492273	79	79
BCAP31	-0.0514553	0.652455298056569	0.779833475336138	79	79
BCAR1	-0.232002	0.0396505944298317	0.114470892215144	79	79
BCAR3	-0.0202884	0.859138207879125	0.91824995525738	79	79
BCAR4	0.138891187024639	0.2221837607944	0.382457844399553	79	32
BCAS1	-0.0782898	0.49282811352016	0.655658621775128	79	38
BCAS2	-0.0395191	0.729500858142128	0.835296330412489	79	79
BCAS3	-0.00871416	0.939244067809321	0.968078074756255	79	79
BCAS4	-0.336239	0.0024483038677657	0.0140923204769609	79	79
BCAT1	0.140778984085313	0.215901392285243	0.375160191086846	79	79
BCAT2	0.194279870868854	0.0862239210145615	0.196772171777014	79	79
BCCIP	0.23310550327664	0.0386929957071035	0.112750118573961	79	79
BCDIN3D	0.054856972776452	0.631106779197762	0.763272537792217	79	79
BCHE	-0.261099	0.0201155576794625	0.0700458922435732	79	78
BCKDHA	0.20189463535188	0.0743750275029664	0.177733330615052	79	79
BCKDHB	-0.257567	0.0219270863909989	0.0745814018293913	79	79
BCKDK	-0.322384	0.00376118651127414	0.0196970883097866	79	79
BCL10	-0.222123	0.0491307697664735	0.132906616426566	79	79
BCL11A	0.427334058385301	8.57173606054286e-05	0.00102585009536447	79	78
BCL11B	0.168335310481192	0.138086740419056	0.274922540632545	79	79
BCL2A1	-0.267751	0.0170500138647873	0.0620087405131226	79	77
BCL2L10	-0.176129	0.120500059743701	0.249729013656577	79	66
BCL2L11	-0.177828	0.116904895528745	0.24471703425976	79	79
BCL2L12	0.128718901121811	0.258243082207922	0.425310500715423	79	79
BCL2L13	0.144936957009059	0.202508973647043	0.359551558034855	79	79
BCL2L14	-0.225722	0.04548131063941	0.12614492295514	79	37
BCL2L15	0.0444534320328403	0.697272161409489	0.813098800220652	79	75
BCL2L1	-0.122374	0.282648213009639	0.452967885283927	79	79
BCL2L2	0.141015520049778	0.21512316003844	0.374281092359139	79	79
BCL2	-0.543839	2.22221473926127e-07	9.99479838542161e-06	79	79
BCL3	-0.100651	0.377456665927166	0.549368747669431	79	79
BCL6B	-0.470736	1.19785693482506e-05	0.00021814080150204	79	79
BCL6	0.10027115106188	0.379269683037711	0.551296464331422	79	79
BCL7A	0.345793719282656	0.00180001845356302	0.011104420061215	79	79
BCL7B	-0.300494	0.00712874031059472	0.0321300017727574	79	79
BCL7C	-0.0965044	0.397522011312264	0.568895862692009	79	79
BCL8	-0.0601683	0.598373286399313	0.73928040009014	79	58
BCL9L	0.0298166746478396	0.794208005050012	0.877964150766918	79	79
BCL9	-0.192692	0.0888735333339142	0.20107462034282	79	79
BCLAF1	0.203426582488466	0.0721567658919533	0.1742212050375	79	79
BCMO1	-0.257145	0.0221524339169956	0.0751071244490015	79	42
BCO2	-0.288361	0.00996175026643512	0.0414375449565163	79	79
BCORL1	0.221491685649261	0.0497948943340027	0.134079512770657	79	79
BCORL2	-0.162902	0.1514493091299	0.293515234519316	79	20
BCOR	0.2576453210307	0.0218855407159271	0.0744924951506566	79	79
BCR	0.126508585683549	0.266576538541232	0.434924097805588	79	79
BCS1L	0.179486878376379	0.113474097044946	0.239303764022623	79	79
BDH1	-0.141455	0.213681713016488	0.372415656641506	79	79
BDH2	-0.339318	0.00221958638926911	0.013023908000141	79	79
BDKRB1	-0.0395105	0.729557123766057	0.835296330412489	79	65
BDKRB2	-0.188559	0.0960718939260753	0.212297809475582	79	79
BDNFOS	-0.291988	0.0090266795833862	0.0384782859031715	79	79
BDNF	0.264599018871171	0.0184486616642349	0.0656480435301384	79	77
BDP1	0.0164559326150499	0.885546332713357	0.934992693917273	79	79
BEAN	0.165330668663089	0.145362201864591	0.285006588002959	79	75
BECN1	-0.12421	0.275433581706237	0.444871009704244	79	79
BEGAIN	0.0254193138433435	0.824028561311746	0.89703435639813	79	77
BEND2	0.036079550568058	0.75225039062105	0.850492374290372	79	28
BEND3	0.0911740770227987	0.424219339310225	0.59531743195178	79	79
BEND4	0.00602890989484839	0.957945069152749	0.977866443439997	79	45
BEND5	0.365334998085247	0.000930828423315973	0.00667277509586406	79	79
BEND6	-0.223753	0.047448934131596	0.129943696701369	79	78
BEND7	-0.0555022	0.627090433471301	0.760380841840608	79	79
BEST1	-0.457796	2.21543472030722e-05	0.000354396257160808	79	79
BEST2	0.249661846270493	0.0264909025634631	0.0852798680778898	79	19
BEST3	-0.3762	0.000633437864178468	0.00494178632239273	79	72
BEST4	0.508615845138416	1.70344923830969e-06	4.67964606092464e-05	79	75
BET1L	0.247046616923991	0.0281677259395986	0.0889555551390982	79	79
BET1	-0.202346	0.0737158883339995	0.176706157706935	79	79
BET3L	-0.234163	0.0377935095367645	0.110763217827099	79	47
BEX1	0.0281171030558133	0.805701183690411	0.885204845342984	79	79
BEX2	0.124575383301727	0.274012351406909	0.443204723275873	79	79
BEX4	0.0756061728992125	0.507817421596061	0.667926342061196	79	79
BEX5	-0.232437	0.0392704346412425	0.11378887114371	79	79
BFAR	0.247561348639588	0.0278307840159945	0.0881854233431823	79	79
BFSP1	-0.582007	1.84815071120735e-08	1.61734093912897e-06	79	79
BFSP2	-0.193348	0.0877711757980173	0.199376854584643	79	38
BGLAP	0.167708095496453	0.139582292629919	0.277044492966197	79	79
BGN	-0.0831551	0.466257759398201	0.632136352384242	79	79
BHLHA15	0.0609976658978301	0.593331023514614	0.735622035894669	79	28
BHLHB9	-0.121204	0.287308393915737	0.458422930313534	79	79
BHLHE22	-0.541529	2.55819814490466e-07	1.11586279406266e-05	79	70
BHLHE40	-0.0255455	0.82316940172108	0.896739472763756	79	79
BHLHE41	-0.0749795	0.511351120021054	0.670876274379949	79	79
BHMT2	-0.413177	0.000154062556254802	0.00162551545988427	79	79
BHMT	-0.239567	0.0334662168739517	0.101257295735642	79	58
BICC1	-0.0889748	0.43552714856316	0.605455366102035	79	71
BICD1	0.106638093896775	0.349590772851886	0.522615825202296	79	79
BICD2	0.348361781633928	0.00165447171968041	0.0103753187609011	79	79
BID	-0.151001	0.184057941138557	0.336009116633914	79	79
BIK	0.399590430085322	0.000264028193947695	0.00248724075545466	79	79
BIN1	-0.192663	0.0889220716703974	0.201111557590447	79	79
BIN2	-0.548307	1.68747307808606e-07	8.31445630513122e-06	79	79
BIN3	-0.0707656	0.535434976166481	0.690170117239385	79	79
BIRC2	0.218550052292548	0.0529885018308579	0.140126961417625	79	79
BIRC3	-0.488417	4.96104999634084e-06	0.00010881469223843	79	79
BIRC5	0.231020807585866	0.0405180701122695	0.116134516705081	79	78
BIRC6	0.112868642812813	0.321989680208306	0.494464063461063	79	79
BIRC7	-0.123781	0.27710622754081	0.446714548690445	79	78
BIVM	-0.269665	0.0162462146647845	0.0598251697671233	79	79
BLCAP	0.108234863535363	0.342380684170406	0.515262814711358	79	79
BLID	-0.146306	0.198232851859251	0.354196540554131	79	3
BLK	-0.272842	0.0149839382554639	0.0564781457533954	79	44
BLMH	0.123829999817436	0.276916132018746	0.446519759316538	79	79
BLM	-0.0446597	0.695935973484874	0.812030270117494	79	79
BLNK	-0.397801	0.000282964123994701	0.00262723291313371	79	79
BLOC1S1	-0.246082	0.0288087038327304	0.0904627913825307	79	79
BLOC1S2	0.144164526465741	0.204950909562683	0.362475140271643	79	79
BLOC1S3	0.141048130165103	0.215016024411075	0.374212849126364	79	79
BLVRA	-0.184955	0.102717076162006	0.222857107131836	79	79
BLVRB	-0.348581	0.00164254101390931	0.0103198869133299	79	79
BLZF1	0.122232345263392	0.283209128873742	0.453528571037358	79	79
BMF	-0.541326	2.58982242138025e-07	1.11754831083919e-05	79	79
BMI1	-0.0360517	0.752435641747224	0.850552661784645	79	79
BMP10	-0.163551	0.149803975234544	0.291279987443515	79	6
BMP1	0.345062943111337	0.00184349285288112	0.0113076916507202	79	79
BMP2K	-0.609331	2.53536345043402e-09	4.19093411379436e-07	79	79
BMP2	-0.306294	0.00604515159913089	0.0282740585071805	79	79
BMP3	-0.0854451	0.454026705983812	0.621831066760635	79	43
BMP4	0.448408502319028	3.40830107516825e-05	0.000495613103712436	79	79
BMP5	-0.185156	0.102336820512327	0.222256497328289	79	12
BMP6	0.32322053473508	0.00366694541234056	0.0193291698758971	79	79
BMP7	0.459159905916774	2.07882093869898e-05	0.000338770224361391	79	54
BMP8A	-0.10766	0.344963905653388	0.518182674589244	79	79
BMP8B	0.0466207625338807	0.683279868269983	0.802735551715555	79	76
BMPER	-0.304618	0.00634215458299509	0.0293017844326624	79	76
BMPR1A	-0.0739435	0.517220606879235	0.675615315086346	79	79
BMPR1B	-0.414241	0.000147551260114791	0.00157258964262236	79	74
BMPR2	0.165928349356184	0.14389251341775	0.28294496844377	79	79
BMS1P4	0.0530605559933696	0.642344863883511	0.771973076697442	79	77
BMS1P5	0.0647145678220273	0.57097104857207	0.717469955128571	79	79
BMS1	0.283607122699206	0.0113151638395235	0.0456640522223179	79	79
BMX	-0.4506	3.08568095777992e-05	0.000456945403701866	79	76
BNC1	-0.30177	0.00687678328690867	0.0312860476990858	79	42
BNC2	-0.470371	1.21927449951223e-05	0.000221623767110587	79	79
BNIP1	-0.036029	0.752586249667104	0.850623462600771	79	79
BNIP2	-0.00201098	0.985966684810739	0.99320775479138	79	79
BNIP3L	0.0773201798315353	0.498217051000607	0.660328794294938	79	79
BNIP3	0.211387421177875	0.0614702468932307	0.155525192950691	79	79
BNIPL	0.33045223205529	0.0029361347218724	0.0162381600002895	79	74
BOC	-0.323633	0.0036213072439375	0.0191355415567626	79	79
BOD1L	-0.107514	0.345622138461454	0.518719319538947	79	79
BOD1	0.0270699999421009	0.812802820835681	0.88992337833798	79	79
BOK	0.320449893466632	0.00398732352159674	0.0205639565087149	79	79
BOLA1	0.2493909389424	0.0266605818110667	0.0856499064629328	79	79
BOLA2	-0.0752599	0.50976870457515	0.669627572266752	79	79
BOLA3	0.10847925613865	0.341285433612352	0.514531884159172	79	79
BOLL	0.172124212529495	0.129308657664451	0.262306423246328	79	18
BOP1	0.0302529959661223	0.79126437329669	0.876270847483997	79	79
BPESC1	0.117224450601303	0.303546023515102	0.475207267982088	79	6
BPGM	-0.159953	0.159095986561009	0.303204215617847	79	79
BPHL	-0.178087	0.116363152223789	0.243714897553398	79	79
BPIL2	0.0157532223038463	0.890402868925486	0.937774195593746	79	8
BPI	-0.0781489	0.493609358226832	0.656335853427771	79	31
BPNT1	0.0909435893544797	0.425396459887532	0.596171560451077	79	79
BPTF	-0.0793234	0.487117843905942	0.650117942249735	79	79
BRAF	-0.250575	0.0259256280624202	0.0840150212344515	79	79
BRAP	-0.172397	0.128694257716234	0.2615539033451	79	79
BRCA1	0.0971659668446234	0.394279223385919	0.565721506067489	79	79
BRCA2	0.0486470500799911	0.670293820543243	0.793358781475294	79	78
BRCC3	-0.262446	0.0194597117830671	0.0682784517207035	79	79
BRD1	0.115203294383725	0.312016788748114	0.483797377887318	79	79
BRD2	-0.0374799	0.742961733922228	0.844731330632327	79	79
BRD3	0.477596963756822	8.55800586487458e-06	0.000167183670127954	79	79
BRD4	0.208970662824493	0.0645691919255532	0.161214584539143	79	79
BRD7P3	-0.0601428	0.598528563732635	0.73928040009014	79	62
BRD7	-0.262257	0.0195505293461767	0.0685450694555068	79	79
BRD8	-0.28673	0.0104092057834635	0.0427781640144887	79	79
BRD9	0.188759366743577	0.0957131553087929	0.211795471816025	79	79
BRDT	0.0673796331708381	0.555184834257609	0.705147087052089	79	4
BREA2	0.23950771476852	0.0335110041195997	0.101329396446694	79	74
BRE	-0.376417	0.000628487068086134	0.00492102829829386	79	79
BRF1	0.341762055968595	0.00205188328088612	0.0123202181472641	79	79
BRF2	0.0674705705392389	0.554649887842647	0.704783163959931	79	79
BRI3BP	-0.190696	0.0922944463104933	0.206520132753067	79	79
BRI3	-0.263799	0.0188189563926977	0.0665700555562904	79	79
BRIP1	-0.0188845	0.868795600130545	0.923620652293576	79	78
BRIX1	0.128722783485789	0.258228602267317	0.425310500715423	79	79
BRMS1L	-0.13101	0.249794804654236	0.415932778561682	79	79
BRMS1	-0.0610401	0.593073410433811	0.735353234888441	79	79
BRP44L	-0.167817	0.139322288569376	0.276698815047415	79	79
BRP44	-0.182802	0.106853236499691	0.229081209833058	79	79
BRPF1	0.186882500171461	0.0991197528389511	0.217393515525665	79	79
BRPF3	0.258513939291395	0.0214283867907731	0.0732847038962956	79	79
BRS3	-0.0320869	0.778924279251009	0.86906631825975	79	20
BRSK1	0.575525737877356	2.88334912143562e-08	2.2305588803426e-06	79	78
BRSK2	0.317539434819209	0.00435047526867456	0.0220084205326095	79	79
BRWD1	0.108327268080855	0.341966312483113	0.514919688837076	79	79
BRWD3	-0.245177	0.0294207388678372	0.0918181522840037	79	79
BSCL2	-0.136126	0.2316169394028	0.394354398102839	79	79
BSDC1	-0.128943	0.257407959429457	0.424513510306618	79	79
BSG	0.0390714789127215	0.732448581610689	0.837554281815806	79	79
BSND	0.0392948462949612	0.730977043191914	0.836415573028731	79	24
BSN	0.10280454337124	0.367283078860959	0.540130388956805	79	79
BSPRY	-0.207244	0.0668590786706046	0.165162163940413	79	78
BST1	-0.317568	0.00434672331735244	0.0219951933431701	79	79
BST2	-0.200288	0.07675992464709	0.181861685982448	79	79
BSX	0.0902171572713291	0.429118620935885	0.599708180644104	79	3
BTAF1	0.134725403331321	0.23649822187822	0.400129088542103	79	79
BTBD10	-0.361927	0.0010474288939316	0.00728309432210051	79	79
BTBD11	-0.0487958	0.669344039237882	0.792622686680176	79	79
BTBD12	-0.18571	0.101296489553299	0.220691011373303	79	79
BTBD16	0.15748534017744	0.165711550503917	0.312156009867963	79	56
BTBD17	-0.248588	0.0271691874573621	0.086766416227671	79	10
BTBD18	0.073269475263033	0.521057232426385	0.678922513988162	79	49
BTBD19	-0.301548	0.00691994178135422	0.031452802362254	79	78
BTBD1	-0.0361475	0.751798807243671	0.850303739432132	79	79
BTBD2	0.320884942339805	0.00393542414611556	0.0203700081441333	79	79
BTBD3	-0.122064	0.283879591315963	0.454263718025047	79	79
BTBD6	0.0889239906376801	0.435790388613034	0.605647177046283	79	79
BTBD7	0.0706020858622858	0.536380828642021	0.690974836870492	79	79
BTBD8	-0.209056	0.0644571835208406	0.160997278741193	79	60
BTBD9	-0.328901	0.00308084725414527	0.0168457975389227	79	79
BTC	-0.251553	0.025331691068182	0.0827109549687601	79	54
BTD	-0.413667	0.000151032022080952	0.00160484820747708	79	79
BTF3L1	-0.194417	0.0859973889427041	0.196408774462907	79	17
BTF3L4	0.0199041777788568	0.861779345197394	0.919802016342031	79	79
BTF3	0.00413314000275452	0.971162154995543	0.984654053872283	79	79
BTG1	0.157413751771047	0.165906441864535	0.312397097231049	79	79
BTG2	-0.0577622	0.613108635995935	0.750273723783045	79	79
BTG3	0.145847300831776	0.199657810084773	0.355957228116927	79	79
BTG4	0.1515919009222	0.182327154817868	0.333826296902165	79	24
BTK	-0.580278	2.08293946934737e-08	1.78248005916717e-06	79	79
BTLA	-0.358901	0.0011619025806803	0.00791134128968061	79	72
BTN1A1	0.0921889462462499	0.419058574529858	0.590830527621512	79	54
BTN2A1	-0.215667	0.0562792844020477	0.146099511454443	79	79
BTN2A2	0.116326439571831	0.307290958299019	0.479527518772827	79	79
BTN2A3	-0.00976092	0.931962399595534	0.963331093134859	79	79
BTN3A1	-0.391248	0.000363440284499056	0.00319233760527539	79	79
BTN3A2	-0.365517	0.000924945128029667	0.0066425691704767	79	79
BTN3A3	-0.289482	0.0096642058654866	0.0405083964972932	79	79
BTNL2	-0.0614167	0.590790398908151	0.73339294285227	79	8
BTNL3	-0.21418	0.0580412915247722	0.149336757811882	79	38
BTNL8	-0.222374	0.0488684214479851	0.132369085546783	79	44
BTNL9	-0.0617738	0.588629565513584	0.731625693896704	79	79
BTRC	0.135707996746588	0.233065590196835	0.396088621652618	79	79
BUB1B	0.216761266057506	0.0550112286632694	0.143761524683943	79	79
BUB1	0.299048214145992	0.00742415736681902	0.0330076329825931	79	79
BUB3	0.510179004367307	1.56368622268313e-06	4.35759244188643e-05	79	79
BUD13	0.0413115741591673	0.717735392696317	0.826643788396068	79	79
BUD31	0.135963333998865	0.232179284330679	0.39496414451186	79	79
BVES	-0.109574	0.336408119063871	0.509234129084542	79	79
BYSL	0.198617783671769	0.0793033004333308	0.185906161258257	79	79
BZRAP1	0.0466577384063196	0.683042058584678	0.802603593398654	79	79
BZW1	0.101652941673639	0.372702849195372	0.545220750839989	79	79
BZW2	-0.186949	0.0989980661988201	0.217200521870128	79	79
C10orf105	-0.368966	0.000819668798871978	0.00605284252393435	79	73
C10orf107	-0.0487137	0.669868355901269	0.793000795931354	79	76
C10orf108	-0.184867	0.10288218232313	0.223115179062552	79	77
C10orf10	-0.428207	8.26025480232327e-05	0.000996589693555409	79	79
C10orf110	0.427890027425414	8.3721593799286e-05	0.0010079229831089	79	78
C10orf111	0.163086760534149	0.150980610680894	0.292904505022418	79	76
C10orf113	0.163268705050763	0.15051909286521	0.292302365299042	79	5
C10orf114	0.155586029628516	0.17093961862623	0.318863061750702	79	79
C10orf116	-0.468662	1.32416533936735e-05	0.000236879851800513	79	79
C10orf118	0.0617582420958526	0.588723706778385	0.731695680810614	79	79
C10orf119	0.149815054410211	0.187566563930433	0.340773823054446	79	79
C10orf11	0.100937031513516	0.376096481372838	0.547842581136603	79	79
C10orf120	-0.0988674	0.386011959869021	0.558333056904261	79	10
C10orf125	0.127230336913363	0.263835642055231	0.432165776009839	79	79
C10orf128	-0.562824	6.70737189165835e-08	4.10508140457824e-06	79	67
C10orf129	0.0113480322506911	0.920932627432454	0.956358650136805	79	6
C10orf12	-0.00739693	0.948414221317628	0.973090663001305	79	79
C10orf131	0.0816097118770202	0.474612014769189	0.639072144440542	79	66
C10orf137	0.20019774916094	0.0768955373121504	0.182116053345211	79	79
C10orf140	-0.156858	0.167425300627956	0.31436944797521	79	79
C10orf18	0.16467115065823	0.146996994648172	0.287454183669933	79	79
C10orf25	-0.526347	6.28848067461702e-07	2.14118338463192e-05	79	79
C10orf26	0.40580851621457	0.00020692486834599	0.00204911774388707	79	79
C10orf27	-0.0828834	0.467720638743041	0.633649840129669	79	8
C10orf28	0.320225747411159	0.00401430019265076	0.0206700121740856	79	79
C10orf2	0.531385179938088	4.68841239278875e-07	1.7606581684764e-05	79	79
C10orf32	0.058396369194539	0.609209751495003	0.747169547461053	79	79
C10orf35	0.26608583452268	0.0177771774868818	0.0639171988466803	79	79
C10orf41	0.476775718286839	8.91290549937424e-06	0.000171688837009858	79	79
C10orf46	-0.114402	0.315416633926315	0.487466653359033	79	79
C10orf47	-0.131159	0.24925017513074	0.415309587923539	79	79
C10orf4	0.329798359286947	0.00299639120038427	0.0165053277742614	79	79
C10orf50	0.0555165833833892	0.627001086430151	0.760380841840608	79	27
C10orf53	-0.00543013	0.962118639271662	0.980367464884823	79	10
C10orf54	-0.597116	6.30488217833527e-09	7.76665104006395e-07	79	79
C10orf55	-0.385324	0.000453723649094433	0.00381190937162743	79	55
C10orf57	0.119014735422373	0.296169174800316	0.467524804876167	79	79
C10orf58	-0.0823282	0.47071804416626	0.636087686848481	79	79
C10orf62	0.0670195250739764	0.557305622879673	0.706297857451517	79	63
C10orf67	0.0672181412438281	0.55613543224893	0.705844550445879	79	44
C10orf68	-0.0598485	0.600322692587176	0.740614227434503	79	79
C10orf72	0.557929747063601	9.19993172292957e-08	5.26410294442183e-06	79	79
C10orf75	0.0342537205911444	0.764414444684591	0.858758618291809	79	79
C10orf76	0.0417529626351612	0.714848174236741	0.824639897068589	79	79
C10orf78	0.0368593011510226	0.747073664196019	0.847314371660274	79	79
C10orf79	0.0353730822455832	0.756950058912904	0.853916096342032	79	79
C10orf81	0.0352912443268222	0.757495046248748	0.854174928252043	79	31
C10orf82	0.184487607394472	0.103603489767997	0.224251985686968	79	78
C10orf84	0.0997440152680291	0.381793121222787	0.55373778801517	79	79
C10orf88	0.0975335417991379	0.392484312663004	0.564234490961309	79	79
C10orf90	-0.0973392	0.393433	0.564906266292557	79	23
C10orf91	-0.0920406	0.41981091366916	0.591343268052554	79	32
C10orf93	0.459121462214948	2.08256123674881e-05	0.000339029750157593	79	63
C10orf95	0.3559565941061	0.00128402062165964	0.00854246949532076	79	76
C10orf96	0.0626379162852007	0.583415227541337	0.727247856954525	79	6
C10orf99	0.0236420372552148	0.836154718502183	0.903521748565885	79	8
C11orf10	0.0919949908886108	0.420042058637738	0.591410411623023	79	79
C11orf16	-0.0624033	0.584828732625694	0.728355107678641	79	29
C11orf17	-0.251538	0.0253408217188673	0.0827158636359314	79	79
C11orf1	0.0817286703337053	0.473966090985808	0.638779890012321	79	79
C11orf20	0.163146020301662	0.150830177274138	0.292700745382484	79	60
C11orf21	-0.393521	0.000333416901955659	0.00298117562821195	79	64
C11orf24	0.167535459746391	0.13999606814531	0.277627361498312	79	79
C11orf2	-0.389155	0.000393262523478686	0.00340299651189163	79	79
C11orf30	-0.118616	0.29780173313598	0.469330020303006	79	79
C11orf31	-0.190935	0.0918795903089568	0.205951701040244	79	79
C11orf34	0.0172954501544092	0.879749837148674	0.931273226625909	79	36
C11orf35	0.0181458162524316	0.873884872009959	0.927224039868826	79	79
C11orf36	-0.0921974	0.41901553427519	0.590830527621512	79	5
C11orf41	-0.169418	0.135534799168093	0.271377110057207	79	78
C11orf42	-0.0299658	0.793201883171239	0.877654580956105	79	21
C11orf45	-0.0687759	0.546998593883096	0.698788084133633	79	79
C11orf46	0.145583740045319	0.200480299825329	0.356959031359038	79	79
C11orf48	0.0859309300273083	0.451455158453302	0.619581518910506	79	79
C11orf49	-0.121873	0.284635668166426	0.455134669064794	79	79
C11orf51	0.017700175628642	0.876957623650082	0.929385743952687	79	79
C11orf52	-0.503683	2.22566628274548e-06	5.76230065706795e-05	79	73
C11orf53	-0.245993	0.0288679458170551	0.0905605956369578	79	14
C11orf54	-0.398082	0.000279904144478815	0.00260632939538771	79	79
C11orf57	0.225088217725755	0.0461070370855146	0.127314405658745	79	79
C11orf58	0.133738130994794	0.239982335699409	0.403974094562326	79	79
C11orf59	-0.0499689	0.66187362982897	0.787440698873787	79	79
C11orf61	-0.041969	0.713436633452962	0.823571812291939	79	79
C11orf63	-0.480019	7.58690504163798e-06	0.000151581346596362	79	79
C11orf65	-0.207021	0.0671598073740465	0.165651150951927	79	77
C11orf66	0.0620667519277305	0.586859485696159	0.729941633118768	79	79
C11orf67	0.298232563643736	0.00759551277294388	0.0335755931911871	79	79
C11orf68	0.00575178709411627	0.959876514832787	0.97901127501667	79	79
C11orf70	-0.354645	0.00134208275672706	0.00884055875854951	79	78
C11orf71	-0.00870886	0.939280955630713	0.968078074756255	79	79
C11orf73	0.111987882273363	0.325804408864896	0.498568907313867	79	79
C11orf74	-0.115894	0.309104936653695	0.481118298299598	79	79
C11orf75	-0.410358	0.000172604866599466	0.00177091677455368	79	79
C11orf80	-0.0493444	0.665846517799318	0.790319851125495	79	79
C11orf82	0.35061955270576	0.00153537340248741	0.00979545341666199	79	79
C11orf83	0.204353237840457	0.0708409575232515	0.171893362400928	79	79
C11orf84	0.0336330191827647	0.768562865906834	0.861581603677149	79	79
C11orf85	0.237874937678725	0.0347738800545546	0.104235406115172	79	24
C11orf86	0.195054519808129	0.0849541679879204	0.194923906618387	79	63
C11orf87	0.226860117433012	0.044374802354636	0.123857508664838	79	53
C11orf88	-0.375433	0.000651164453735802	0.00504952707908998	79	63
C11orf90	0.185076476237183	0.102486620619073	0.222506875030632	79	23
C11orf92	-0.417268	0.000130396426261202	0.00142478355022127	79	79
C11orf93	-0.372072	0.000734327106706729	0.00555629352257752	79	77
C11orf94	-0.106809	0.348816250445813	0.521821340007891	79	5
C11orf95	-0.468835	1.31317723824018e-05	0.000235592280033071	79	79
C11orf9	0.158948175420955	0.161766042411202	0.306630918380148	79	79
C12orf10	0.0160410170285497	0.88841337859714	0.936803595336606	79	79
C12orf11	0.106879515904687	0.34849463008006	0.521622641107372	79	79
C12orf12	0.167110425192341	0.141018738543021	0.279036464438512	79	7
C12orf23	-0.274921	0.0142044869836323	0.0541736892651248	79	79
C12orf24	0.0971863957443698	0.394179339112734	0.565662122018274	79	79
C12orf26	-0.27046	0.0159219931005613	0.0590585628240997	79	79
C12orf27	-0.195121	0.0848451556609382	0.194719984630657	79	6
C12orf29	-0.137875	0.225616607617777	0.386717999819122	79	79
C12orf32	-0.191457	0.0909778130781729	0.204445825700776	79	79
C12orf34	0.229648798508553	0.0417578202596371	0.118799094413266	79	79
C12orf35	-0.502385	2.38616830288215e-06	6.08819194957003e-05	79	79
C12orf39	-0.256862	0.0223049244397907	0.0754419794798096	79	35
C12orf40	0.022724050441601	0.842433211524413	0.907214116091216	79	21
C12orf41	-0.0206567	0.856607977720695	0.916457	79	79
C12orf42	-0.227251	0.0439999603559085	0.123077702239409	79	24
C12orf43	-0.172362	0.128771985017945	0.261629392819316	79	79
C12orf44	0.0036565593639694	0.974486181247564	0.986576074193995	79	79
C12orf45	-0.127099	0.264333810577595	0.432688607411823	79	79
C12orf47	-0.108939	0.339233021339661	0.512639993179329	79	79
C12orf48	0.127657558976317	0.26222224894963	0.430324844691205	79	79
C12orf49	-0.202491	0.0735045706792656	0.176308867287238	79	79
C12orf4	-0.0371665	0.745037423574687	0.846146207759378	79	79
C12orf50	0.0247048726773944	0.828898333101896	0.899704794213422	79	38
C12orf51	-0.216876	0.0548801883428221	0.143565919457619	79	79
C12orf52	-0.143417	0.207332685020076	0.365124339880349	79	79
C12orf53	0.49534655486386	3.46443942673952e-06	8.18098394543863e-05	79	74
C12orf54	-0.201142	0.0754839917848067	0.17965301515114	79	61
C12orf56	0.200378303494499	0.0766241443144437	0.181594832910394	79	30
C12orf57	0.0141713006302013	0.901350261664953	0.944434601141065	79	79
C12orf59	-0.211603	0.0612000731501556	0.155105414064213	79	64
C12orf5	0.070840240938989	0.535003693798955	0.689808645233849	79	79
C12orf60	-0.0923453	0.41826693542811	0.590243161705921	79	79
C12orf61	-0.217684	0.0539599419934047	0.141945766886894	79	79
C12orf62	0.00799018601737332	0.944283243412377	0.970889841977425	79	79
C12orf63	0.0439705374051463	0.700403730826618	0.81512866495287	79	46
C12orf65	-0.017805	0.876235012485113	0.929078132755597	79	79
C12orf66	-0.0725787	0.525004542981277	0.681906505121416	79	79
C12orf68	0.439586214074841	5.05154462171349e-05	0.00067892198043043	79	79
C12orf69	-0.305182	0.00624089069308914	0.0289504312673435	79	77
C12orf70	-0.168341	0.138074318603876	0.274922540632545	79	44
C12orf71	-0.131444	0.248214213846102	0.414082885860744	79	29
C12orf72	-0.252166	0.0249653770633429	0.0817663661989928	79	79
C12orf73	-0.0145629	0.898638371144149	0.942445162611124	79	79
C12orf74	-0.201113	0.075527429148404	0.179734278298282	79	3
C12orf75	-0.344412	0.00188303678519294	0.0114955564340852	79	79
C12orf76	0.00273456257637361	0.980918052820727	0.99035878732987	79	79
C12orf77	-0.119784	0.293036047714069	0.464686549917194	79	3
C13orf15	-0.0631715	0.580205687612517	0.724786490501219	79	79
C13orf16	-0.249374	0.0266713482096592	0.0856499064629328	79	58
C13orf18	-0.178827	0.114829518432091	0.241496616624254	79	79
C13orf1	-0.161559	0.154896727298115	0.297749745994244	79	79
C13orf23	-0.0817191	0.474018010669539	0.638779890012321	79	79
C13orf26	-0.105042	0.356889310514597	0.529582703002815	79	3
C13orf27	-0.0426718	0.708850656354783	0.820727971278702	79	79
C13orf29	-0.154136	0.175010690232956	0.324360972602335	79	79
C13orf30	0.079566952417667	0.485777441980987	0.649225052029043	79	13
C13orf31	-0.195027	0.0849989288137485	0.194967695088603	79	79
C13orf33	-0.00703565	0.950930589166611	0.974171525885621	79	78
C13orf34	0.138177407296764	0.224592246298878	0.385482254474646	79	79
C13orf35	0.306457826240102	0.0060167486203087	0.0281730596634436	79	20
C13orf36	-0.356227	0.00127232676369481	0.00847341584361491	79	45
C13orf37	0.223029277233857	0.0481896228825722	0.131210376819505	79	79
C13orf38	0.112448208025293	0.323807077819097	0.496466535993447	79	77
C14orf101	0.218091122556568	0.0535015487075669	0.14110458911828	79	79
C14orf102	-0.0752501	0.509823523040971	0.669654097773185	79	79
C14orf104	0.365707194407956	0.000918836613261243	0.00660960333012249	79	79
C14orf105	-0.210395	0.0627275708675633	0.157961503739581	79	15
C14orf106	-0.129289	0.256123146714347	0.423116225972108	79	79
C14orf109	0.0498642115349719	0.66253917246966	0.787796347713693	79	79
C14orf115	0.0561329196315599	0.623174957443457	0.757565957876569	79	17
C14orf118	0.00636222023721846	0.955622338219026	0.977003468237314	79	79
C14orf119	0.169840539009872	0.134547046670794	0.27007160172425	79	79
C14orf126	-0.0254222	0.824008707417832	0.89703435639813	79	79
C14orf128	0.0873173237826344	0.44416068746075	0.612875834438563	79	79
C14orf129	0.193016129970411	0.0883275683711724	0.200210032372523	79	79
C14orf132	0.108777814012708	0.33995042774486	0.513173110084463	79	78
C14orf135	0.158912923568759	0.161860297536593	0.306749451676404	79	79
C14orf138	0.439386168166446	5.09617950760338e-05	0.00068444521997951	79	79
C14orf139	0.0154295159689938	0.892641419997219	0.939071915752883	79	79
C14orf142	0.156174709379763	0.169306422961003	0.316794332436707	79	79
C14orf143	0.0453582529529045	0.69141802857752	0.808989259435214	79	79
C14orf145	0.062220640015284	0.585930595105591	0.729208346804513	79	79
C14orf147	0.0821565885338694	0.471646491058761	0.636669003937818	79	79
C14orf148	0.0146303636368931	0.898171414725256	0.942212798914431	79	78
C14orf149	-0.227467	0.0437939054476321	0.122690615527177	79	79
C14orf153	0.243711213879318	0.0304356288844716	0.0941950812331061	79	79
C14orf156	0.115103478093928	0.312439043325157	0.484094861714292	79	79
C14orf159	-0.170273	0.133543916340414	0.268643576245435	79	79
C14orf162	0.141224593325533	0.214436935149667	0.3735552446221	79	44
C14orf166B	0.104528787363072	0.359258845397318	0.531848290721382	79	9
C14orf166	0.31717107847836	0.00439847151256417	0.0221976291396984	79	79
C14orf167	0.241731393658986	0.0318531415846099	0.0976136520751632	79	79
C14orf169	-0.170276	0.13353490606437	0.268643576245435	79	79
C14orf174	0.0477885902196236	0.67578399473761	0.797337910288218	79	78
C14orf176	0.335108392460466	0.00253747781141791	0.0145277740890534	79	79
C14orf178	0.186073719861088	0.100616656971345	0.219655282292112	79	43
C14orf179	0.0986283326104183	0.387167173553248	0.559334663219528	79	79
C14orf180	-0.1902	0.0931620171325094	0.207886628746133	79	44
C14orf181	0.473819937665466	1.03076021016105e-05	0.000194108105788848	79	79
C14orf182	0.220950924759482	0.0503698020335244	0.135111230420022	79	75
C14orf183	0.108046014422979	0.343228522827873	0.516247258380717	79	14
C14orf184	-0.0547011	0.632078507513085	0.763929404780844	79	11
C14orf19	-0.173919	0.12530219930371	0.25673742287676	79	73
C14orf1	0.375196146346037	0.000656731865896033	0.00508183955601608	79	79
C14orf21	0.162644233618951	0.152107529510685	0.294352573617835	79	79
C14orf23	-0.216884	0.0548705391390628	0.143565919457619	79	4
C14orf28	0.220127892170379	0.0512552619997314	0.136734650154548	79	79
C14orf2	0.0388581122267276	0.733855136915114	0.838468621016027	79	79
C14orf33	0.0839987911402567	0.46173095621945	0.628643202624721	79	79
C14orf34	-0.141068	0.214949689309051	0.374212529591957	79	46
C14orf37	0.427642472695559	8.46048668332264e-05	0.00101567853789857	79	79
C14orf39	0.191796421807083	0.0903961835302141	0.203594059563799	79	22
C14orf43	0.0837535150651912	0.463044516218779	0.629500980154027	79	79
C14orf45	-0.416539	0.000134349060797322	0.00145645226223106	79	79
C14orf48	-0.121627	0.285617660051692	0.456289901321636	79	12
C14orf49	-0.0966219	0.396945065746172	0.568642731202474	79	79
C14orf4	-0.022256	0.845638190687276	0.909197387585719	79	79
C14orf50	-0.228439	0.042877129757734	0.121128204720212	79	73
C14orf53	-0.0238422	0.834787269489008	0.902952225498737	79	4
C14orf64	-0.011126	0.922474608530314	0.95737370158177	79	50
C14orf68	-0.0245267	0.830113998630207	0.900314307621591	79	48
C14orf70	0.316368502846812	0.00450467838975268	0.022616947055508	79	42
C14orf72	-0.129125	0.256732787629181	0.42376138198757	79	34
C14orf73	-0.215009	0.0570537716133423	0.147654214238196	79	64
C14orf79	0.290777983676241	0.00932970858403144	0.039482836764807	79	79
C14orf80	0.352425044829468	0.00144576416967875	0.00935779084390461	79	79
C14orf93	0.0615095272603802	0.590228555582942	0.732953657697066	79	79
C15orf17	0.437560835913861	5.52071456486054e-05	0.000724851457463699	79	79
C15orf21	0.0609918568375979	0.593366275075327	0.735622035894669	79	78
C15orf23	0.24270330790544	0.0311504859984798	0.0959468703950629	79	79
C15orf24	0.200600349492998	0.0762914350822912	0.181184166663279	79	79
C15orf26	-0.215405	0.0565861203791487	0.146642141431938	79	61
C15orf27	-0.0154241	0.892679076661317	0.939071915752883	79	79
C15orf28	0.047969590563236	0.674625010106966	0.796422409637908	79	59
C15orf29	0.202896799035457	0.0729178053615967	0.175467258391599	79	79
C15orf2	-0.183772	0.104973818585872	0.226255839903128	79	18
C15orf33	-0.190041	0.0934409955248384	0.208340886955312	79	78
C15orf34	-0.315529	0.00461826031256948	0.0230111969795197	79	79
C15orf37	0.00835671193504039	0.941731765017723	0.969658325903357	79	79
C15orf38	-0.147501	0.194551422528636	0.349621307536129	79	79
C15orf39	-0.233139	0.0386640954692169	0.112692609898246	79	79
C15orf40	-0.0795446	0.4859002583797	0.649264654190429	79	79
C15orf41	-0.240019	0.0331235796882739	0.100598308915078	79	79
C15orf42	0.337965151985322	0.0023176060742623	0.0134682997224257	79	79
C15orf44	0.00282790260939269	0.980266848343397	0.990022882825015	79	79
C15orf48	0.0178878689531316	0.875663228802638	0.928573683794442	79	77
C15orf50	0.0654003352232225	0.566889026916668	0.714336316169426	79	4
C15orf51	-0.0384047	0.736847110966463	0.840447223760993	79	73
C15orf52	-0.349059	0.0016168292672233	0.0102221242327881	79	79
C15orf53	-0.252504	0.0247654766333578	0.0813824881239761	79	7
C15orf54	-0.151267	0.183275893677002	0.335007323349704	79	50
C15orf55	0.305974045720681	0.00610086871682087	0.02847268363497	79	32
C15orf56	0.0336544695272091	0.768419394601837	0.861565730226157	79	69
C15orf57	-0.281423	0.0119889040959314	0.0475426297345321	79	79
C15orf58	-0.231739	0.0398814572835235	0.114800546734315	79	79
C15orf59	0.186009554775975	0.100736166874822	0.219767339803616	79	79
C15orf5	0.10818371756871	0.342610174396718	0.515526561658098	79	14
C15orf60	-0.0275953	0.809238263054299	0.887527957778731	79	4
C15orf61	0.0492459329077637	0.666473914974003	0.79065541215725	79	79
C15orf62	0.045493823458565	0.690542441721768	0.808391682706961	79	79
C15orf63	0.14913872180192	0.189589232768655	0.343416293129698	79	79
C16orf11	0.197537505891549	0.08098389253461	0.188520520175657	79	27
C16orf13	0.410392672040857	0.000172366037224194	0.00176940507426534	79	79
C16orf3	-0.0539769	0.636602138116254	0.76728688465464	79	66
C16orf42	0.0711955930152329	0.532952120935024	0.688116297408596	79	79
C16orf45	0.200584449106426	0.076315221440496	0.181184166663279	79	79
C16orf46	-0.079485	0.486228287970991	0.649504736152976	79	79
C16orf48	0.0912200657016237	0.423984694766791	0.595185018276093	79	79
C16orf52	-0.223723	0.0474798485636754	0.129991361082467	79	79
C16orf53	0.0771307878473942	0.499273187141475	0.661184842462073	79	79
C16orf54	-0.567155	5.04957028584671e-08	3.26617690061122e-06	79	75
C16orf55	-0.0521255	0.648226519164613	0.77650671295408	79	79
C16orf57	-0.371382	0.000752557224551854	0.00566983121263454	79	79
C16orf58	-0.120262	0.291099527216818	0.462715941182975	79	79
C16orf59	0.374813322616286	0.000665821812640273	0.00514051650956602	79	79
C16orf5	-0.231642	0.0399672865654004	0.114973571645819	79	79
C16orf61	0.098475419015964	0.387907239813325	0.560069131615507	79	79
C16orf62	-0.230988	0.0405470799251824	0.116147482135449	79	79
C16orf63	0.0199927443613849	0.861170421160741	0.919608853472957	79	79
C16orf68	0.320173278743592	0.00402063837115411	0.0206890498014979	79	79
C16orf70	-0.199304	0.0782501146946908	0.184183134371353	79	79
C16orf71	0.00928523591256697	0.935270759427843	0.96547299105068	79	79
C16orf72	-0.0287444	0.801453964608968	0.882845570173574	79	79
C16orf73	0.207701093833879	0.0662470714923234	0.164132508667888	79	65
C16orf74	0.084040026601926	0.461510322881944	0.628387049038074	79	79
C16orf75	0.330091352123948	0.0029692555525242	0.016397887603032	79	79
C16orf79	0.551831487203048	1.35428506625961e-07	7.04082612404861e-06	79	79
C16orf7	-0.244388	0.0299634172199577	0.0930164508882795	79	79
C16orf80	-0.1798	0.112835335459344	0.238261315403833	79	79
C16orf81	0.101729071754486	0.372343066808632	0.544901672319865	79	49
C16orf82	-0.160687	0.157166887018149	0.300653570220673	79	3
C16orf86	-0.0612396	0.591863932275273	0.734135996036671	79	79
C16orf87	-0.220205	0.0511722261503138	0.136641805204917	79	79
C16orf88	0.114440170266234	0.315254416530617	0.487254888172472	79	79
C16orf89	0.0553387694902802	0.628106766881446	0.760983829573837	79	79
C16orf90	-0.0117478	0.91815638028031	0.955029358406495	79	7
C16orf91	0.282732063899703	0.0115809832372326	0.0464970346290384	79	79
C16orf92	0.140292513379984	0.217508182751257	0.376767420905447	79	18
C16orf93	0.0838879453795805	0.462324330662492	0.628956610123432	79	79
C17orf100	0.143890859852674	0.205821084815416	0.363589676683426	79	79
C17orf101	-0.272115	0.0152650269933407	0.0572808735062492	79	79
C17orf102	0.079002183773905	0.488888784865488	0.651806776457916	79	55
C17orf103	0.131118896401758	0.249397007033827	0.41548265277235	79	79
C17orf104	0.129902327073205	0.253854828479215	0.420338388937331	79	79
C17orf105	-0.12483	0.273025897299403	0.442302222386066	79	6
C17orf106	-0.380373	0.00054442523936446	0.00439448419420228	79	79
C17orf107	0.0287191482812066	0.801625069774421	0.882933472830874	79	79
C17orf108	-0.146589	0.197355558056747	0.35311837291308	79	79
C17orf28	-0.330472	0.0029342880839319	0.0162350541136269	79	79
C17orf37	-0.0378733	0.740358501636815	0.843060140229392	79	79
C17orf39	0.171154992796561	0.131512602195146	0.265662599378956	79	79
C17orf42	-0.0557853	0.625331460861326	0.75904791646633	79	79
C17orf44	-0.34704	0.00172798995019926	0.0107416699015475	79	79
C17orf46	0.0754871257903629	0.508487736271844	0.66848975729029	79	44
C17orf47	-0.185478	0.101731095838093	0.221363568126543	79	60
C17orf48	0.142490806823767	0.210313995100178	0.368397125734756	79	79
C17orf49	0.138214776774885	0.22446569967955	0.385299248407073	79	79
C17orf50	0.119603069311758	0.293770850169025	0.465564959068362	79	36
C17orf51	-0.110174	0.333748997088817	0.506569267281253	79	79
C17orf53	0.246251346240029	0.0286950802907427	0.0902085261415741	79	79
C17orf54	0.0674926122293105	0.554520263037216	0.704719535230632	79	12
C17orf55	0.527774489416292	5.78923780402856e-07	2.036432153269e-05	79	79
C17orf56	0.333154551120679	0.00269844201489845	0.0152417840444323	79	79
C17orf57	-0.190297	0.0929906296891819	0.207647936518737	79	76
C17orf58	-0.261601	0.019869183173215	0.0693127710263307	79	79
C17orf59	-0.0151993	0.894234223704227	0.940020104709194	79	79
C17orf60	-0.511391	1.46282963778939e-06	4.13009126932071e-05	79	75
C17orf61	-0.14581	0.199772802698217	0.356092719279586	79	79
C17orf62	-0.166556	0.142361635845609	0.280890678359586	79	79
C17orf63	0.152150110788051	0.180703330199238	0.331683294344853	79	79
C17orf64	-0.214255	0.0579514601114165	0.149239316604813	79	40
C17orf65	0.154244167798003	0.174705574829334	0.324012832489387	79	79
C17orf66	0.0903313370783041	0.428532349376985	0.59913363962632	79	27
C17orf67	-0.396753	0.000294625611221167	0.00271853975239378	79	79
C17orf68	-0.196534	0.0825699831508309	0.19100093694088	79	79
C17orf69	0.365296751155117	0.000932068721517679	0.00667884737834454	79	79
C17orf70	0.215524147459445	0.0564467188824597	0.146376983532686	79	79
C17orf71	-0.150557	0.185365597796187	0.337949722980606	79	79
C17orf72	0.197084032774594	0.0816977552874801	0.189634491989902	79	79
C17orf74	0.227958764446999	0.0433280453964249	0.121814856515025	79	21
C17orf75	-0.0154209	0.892700991267671	0.939071915752883	79	79
C17orf76	0.42594295774915	9.09056633189134e-05	0.00107530001748488	79	79
C17orf77	0.104827556444434	0.357879504871697	0.530573557645641	79	4
C17orf78	-0.103533	0.363879253316582	0.536266460347687	79	11
C17orf79	-0.0489814	0.66816036599761	0.791802786666285	79	79
C17orf80	0.162885359668098	0.151492713080238	0.293515234519316	79	79
C17orf81	0.240021586139331	0.0331215957965395	0.100598308915078	79	79
C17orf82	0.27445769196973	0.0143750388037977	0.0546745985687203	79	79
C17orf85	-0.185278	0.102106790521947	0.221981264466554	79	79
C17orf86	0.214936738171845	0.057138943480697	0.147795528543089	79	79
C17orf87	-0.431597	7.14770205190508e-05	0.000883300688075682	79	74
C17orf88	-0.159909	0.159212062143476	0.303335758236117	79	5
C17orf89	-0.000911662	0.99363783466021	0.997030490549696	79	79
C17orf90	0.0893077044463682	0.433804619957604	0.603885507088467	79	79
C17orf91	0.186495548036751	0.0998337417439739	0.218365139711429	79	79
C17orf93	0.103767852979464	0.362786652118839	0.535104778216774	79	18
C17orf95	0.111157251230688	0.329428301013203	0.502060153001998	79	79
C17orf96	0.603290257622765	3.99754616217554e-09	5.81297314108834e-07	79	79
C17orf97	0.114154039529437	0.316473911229831	0.488554074328299	79	79
C17orf98	-0.119206	0.295389530214402	0.467021672212529	79	19
C17orf99	-0.451496	2.96216081256826e-05	0.000442038503974307	79	25
C18orf10	0.124952903687701	0.272549460228575	0.441910342121114	79	79
C18orf16	-0.156444	0.168561991092218	0.315798596117746	79	17
C18orf18	0.0501684961414834	0.660606036042783	0.786416394008828	79	79
C18orf19	0.197270206154781	0.0814040757422012	0.189157133828448	79	79
C18orf1	-0.149357	0.188934389476631	0.342486745944142	79	79
C18orf21	0.248431008787401	0.0272692475205035	0.0869850629612288	79	79
C18orf22	0.0435061927286912	0.703419720634699	0.817413550682946	79	79
C18orf25	0.166619082951413	0.142207955240246	0.280728983805895	79	79
C18orf26	0.138527887407254	0.223407356087267	0.383993802588673	79	8
[truncated: 17,342 more rows]

## Sheet: Table  SXIV
Table SXIV. GO and KEGG enrichment analysis of EFNA3 co-expressed positively correlated genes.
Ontology	GO ID	Description	Gene ratio	Bg ratio	P-value	Adjusted P-value	q-value	Gene ID	Count
BP	GO:0030900	Forebrain Development	7/41	381/18670	1.72412e-05	0.0214308	0.0175497	HSD3B2/PITX1/TYRO3/NR4A3/LEF1/WNT4/RTN4R	7
BP	GO:0032353	Negative Regulation Of Hormone Biosynthetic Process	2/41	10/18670	0.000209388	0.0449253	0.0367894	CYP27B1/WNT4	2
BP	GO:0006702	Androgen Biosynthetic Process	2/41	11/18670	0.000255562	0.0449253	0.0367894	HSD3B2/WNT4	2
BP	GO:0032351	Negative Regulation Of Hormone Metabolic Process	2/41	11/18670	0.000255562	0.0449253	0.0367894	CYP27B1/WNT4	2
BP	GO:0030534	Adult Behavior	4/41	144/18670	0.000275366	0.0449253	0.0367894	CHRNA4/FGF12/NR4A3/NRXN2	4
BP	GO:0035567	Non-Canonical Wnt Signaling Pathway	4/41	150/18670	0.000321692	0.0449253	0.0367894	LEF1/NLK/WNT4/NKD1	4
BP	GO:0048608	Reproductive Structure Development	6/41	431/18670	0.000331439	0.0449253	0.0367894	CYP27B1/MC2R/TYRO3/VGF/LEF1/WNT4	6
BP	GO:0061458	Reproductive System Development	6/41	434/18670	0.000343937	0.0449253	0.0367894	CYP27B1/MC2R/TYRO3/VGF/LEF1/WNT4	6
BP	GO:0006705	Mineralocorticoid Biosynthetic Process	2/41	13/18670	0.000361426	0.0449253	0.0367894	HSD3B2/WNT4	2
BP	GO:0008212	Mineralocorticoid Metabolic Process	2/41	13/18670	0.000361426	0.0449253	0.0367894	HSD3B2/WNT4	2
BP	GO:0007409	Axonogenesis	6/41	468/18670	0.000513165	0.0579876	0.0474861	EFNA3/EFNA4/NR4A3/SEMA6B/RTN4R/BRSK1	6
BP	GO:0006704	Glucocorticoid Biosynthetic Process	2/41	18/18670	0.000704036	0.071201	0.0583066	HSD3B2/WNT4	2
BP	GO:0021766	Hippocampus Development	3/41	81/18670	0.00074466	0.071201	0.0583066	HSD3B2/NR4A3/LEF1	3
BP	GO:0042446	Hormone Biosynthetic Process	3/41	86/18670	0.000886444	0.0787036	0.0644505	CYP27B1/HSD3B2/WNT4	3
BP	GO:0061053	Somite Development	3/41	89/18670	0.000979188	0.081142	0.0664473	LEF1/WNT4/NKD1	3
CC	GO:1990907	Beta-Catenin-Tcf Complex	2/40	11/19717	0.000218175	0.0185448	0.016076	TLE1/LEF1	2
MF	GO:0004714	Transmembrane Receptor Protein Tyrosine Kinase Activity	3/40	62/17697	0.000368857	0.0299283	0.0252028	EFNA3/EFNA4/TYRO3	3
MF	GO:0070742	C2H2 Zinc Finger Domain Binding	2/40	15/17697	0.000513401	0.0299283	0.0252028	LEF1/EHMT1	2
MF	GO:0005005	Transmembrane-Ephrin Receptor Activity	2/40	17/17697	0.000663078	0.0299283	0.0252028	EFNA3/EFNA4	2
MF	GO:0019199	Transmembrane Receptor Protein Kinase Activity	3/40	79/17697	0.00075103	0.0299283	0.0252028	EFNA3/EFNA4/TYRO3	3
MF	GO:0005003	Ephrin Receptor Activity	2/40	19/17697	0.000831343	0.0299283	0.0252028	EFNA3/EFNA4	2
MF	GO:0046875	Ephrin Receptor Binding	2/40	27/17697	0.00168705	0.0506114	0.0426202	EFNA3/EFNA4	2
MF	GO:0004713	Protein Tyrosine Kinase Activity	3/40	134/17697	0.00341763	0.087882	0.0740059	EFNA3/EFNA4/TYRO3	3
MF	GO:0016247	channel regulator activity	3/40	144/17697	0.00418239	0.0880277	0.0741286	FGF12/NRXN2/DPP10	3
MF	GO:0048018	Receptor ligand activity	5/40	482/17697	0.00440138	0.0880277	0.0741286	EPO/FGF12/VGF/SEMA6B/WNT4	5
KEGG	hsa04934	Cushing syndrome	4/19	155/8076	0.000404069	0.0125379	0.00959841	HSD3B2/MC2R/LEF1/WNT4	4
KEGG	hsa04310	Wnt signaling pathway	4/19	160/8076	0.000455924	0.0125379	0.00959841	LEF1/NLK/WNT4/NKD1	4
KEGG	hsa04360	Axon guidance	4/19	181/8076	0.000726755	0.0133238	0.0102001	EFNA3/EFNA4/SEMA6B/WNT4	4
KEGG	hsa04390	Hippo signaling pathway	3/19	157/8076	0.00555634	0.0763997	0.0584878	LEF1/WNT4/NKD1	3
KEGG	hsa05217	Basal cell carcinoma	2/19	63/8076	0.00940312	0.0915442	0.0700817	LEF1/WNT4	2
KEGG	hsa04927	Cortisol synthesis and secretion	2/19	65/8076	0.00998664	0.0915442	0.0700817	HSD3B2/MC2R	2
KEGG	hsa04520	Adherens junction	2/19	71/8076	0.0118316	0.0929625	0.0711675	LEF1/NLK	2

## Sheet: Table SXV
Table SXV. GO and KEGG enrichment analysis of EFNA3 co-expressed negatively correlated genes.
Ontology	GO ID	Description	Gene ratio	Bg ratio	P-value	Adjusted P-value	q-value	Gene ID	Count
BP	GO:0031348	Negative Regulation Of Defense Response	6/42	239/18670	1.47421e-05	0.0154055	0.0122902	ETS1/HLA-E/TEK/FGL2/RNF125/CD200R1	6
BP	GO:0001913	T Cell Mediated Cytotoxicity	3/42	49/18670	0.00018148	0.0759087	0.0605588	CD1C/HLA-E/PRF1	3
BP	GO:0001771	Immunological Synapse Formation	2/42	14/18670	0.000441942	0.0759087	0.0605588	DOCK2/PRF1	2
BP	GO:0031343	Positive Regulation Of Cell Killing	3/42	68/18670	0.000479212	0.0759087	0.0605588	CD1C/HLA-E/PRF1	3
BP	GO:0006491	N-Glycan Processing	2/42	15/18670	0.000509206	0.0759087	0.0605588	MGAT4A/GNPTAB	2
BP	GO:0002683	Negative Regulation Of Immune System Process	6/42	463/18670	0.000553989	0.0759087	0.0605588	HLA-E/TLR4/FGL2/RNF125/PAG1/CD200R1	6
BP	GO:0042110	T Cell Activation	6/42	464/18670	0.000560315	0.0759087	0.0605588	CD1C/TNFSF8/DOCK2/HLA-E/FGL2/PAG1	6
BP	GO:0002475	Antigen Processing And Presentation Via Mhc Class Ib	2/42	16/18670	0.000581119	0.0759087	0.0605588	CD1C/HLA-E	2
BP	GO:0019883	Antigen Processing And Presentation Of Endogenous Antigen	2/42	22/18670	0.00110912	0.0953768	0.0760901	CD1C/HLA-E	2
BP	GO:0036037	Cd8-Positive, Alpha-Beta T Cell Activation	2/42	23/18670	0.00121302	0.0953768	0.0760901	TNFSF8/HLA-E	2
BP	GO:0002460	Adaptive Immune Response Based On Somatic Recombination Of Immune Receptors Built From Immunoglobulin Superfamily Domains	5/42	361/18670	0.00124252	0.0953768	0.0760901	CD1C/HLA-E/PRF1/TLR4/FGL2	5
BP	GO:0032102	Negative Regulation Of Response To External Stimulus	5/42	365/18670	0.00130466	0.0953768	0.0760901	ETS1/TEK/FGL2/RNF125/CD200R1	5
BP	GO:0050687	Negative Regulation Of Defense Response To Virus	2/42	24/18670	0.00132141	0.0953768	0.0760901	FGL2/RNF125	2
BP	GO:0060343	Trabecula Formation	2/42	24/18670	0.00132141	0.0953768	0.0760901	TEK/SLC40A1	2
BP	GO:0031341	Regulation Of Cell Killing	3/42	98/18670	0.00138785	0.0953768	0.0760901	CD1C/HLA-E/PRF1	3
BP	GO:0050830	Defense Response To Gram-Positive Bacterium	3/42	101/18670	0.00151356	0.0953768	0.0760901	TNFSF8/GBP2/HLA-E	3
BP	GO:0001916	Positive Regulation Of T Cell Mediated Cytotoxicity	2/42	26/18670	0.00155158	0.0953768	0.0760901	CD1C/HLA-E	2
BP	GO:0002456	T Cell Mediated Immunity	3/42	106/18670	0.00173855	0.0982255	0.0783627	CD1C/HLA-E/PRF1	3
BP	GO:0001909	Leukocyte Mediated Cytotoxicity	3/42	107/18670	0.00178592	0.0982255	0.0783627	CD1C/HLA-E/PRF1	3
MF	GO:0042277	Peptide Binding	5/44	295/17697	0.000793511	0.0637892	0.049832	APBB2/CD1C/HLA-E/TLR4/SLC40A1	5
MF	GO:0030676	Rac Guanyl-Nucleotide Exchange Factor Activity	2/44	17/17697	0.00080238	0.0637892	0.049832	DOCK2/EPS8	2
MF	GO:0004896	Cytokine Receptor Activity	3/44	96/17697	0.00174381	0.0726115	0.056724	CSF2RB/IL2RB/IL10RA	3
MF	GO:0033218	Amide Binding	5/44	356/17697	0.0018267	0.0726115	0.056724	APBB2/CD1C/HLA-E/TLR4/SLC40A1	5
								sssss
